# Supplementary material for: Deciphering the fine nucleotide diversity of full HLA class I and class II genes in a well‐documented population from sub‐Saharan Africa
Source: PubMed Central journal article supplement (PMC5767763; doi:10.1111/tan.13180), 2017-12-25
Supplement: TAN-91-36-s002.pdf [file TAN-91-36-s002.pdf]

Supplementary Information S03

NGS-454 Assigned sequence numbers with corresponding alleles

For each locus, each line corresponds to a unique sequence, the number of which is given by "Sequence Number".

Not all sequences identified are represented here because some were found to be artefacts during the analysis and thus removed from the dataset, e.g. sequence numbers 1,3,7,10 for HLA-DRB1 are missing.

"Number of alleles" is the number of ambiguities reported for this sequence, and "Corresponding alleles" is the list of all possible allele ambiguities (according to IPD-IMGT/HLA database ver 3.25.0).

Locus DRB1

| Sequence Number | Number of alleles | Corresponding alleles |               |               |               |                |               |             |             |  |
|-----------------|-------------------|-----------------------|---------------|---------------|---------------|----------------|---------------|-------------|-------------|--|
| 2               | 5                 | DRB1*07:56            | DRB1*07:01:01 | DRB1*07:01:18 | DRB1*07:33    | DRB1*07:34     |               |             |             |  |
| 4               | 8                 | DRB1*03:83            | DRB1*03:01:01 | DRB1*03:01:08 | DRB1*03:01:11 | DRB1*03:100:02 | DRB1*03:104   | DRB1*03:50  | DRB1*03:68N |  |
| 5               | 4                 | DRB3*02:29N           | DRB1*14:141   | DRB3*02:02:01 | DRB3*02:28    |                |               |             |             |  |
| 6               | 1                 | DRB1*13:03:01         |               |               |               |                |               |             |             |  |
| 8               | 1                 | DRB1*01:02:01         |               |               |               |                |               |             |             |  |
| 9               | 4                 | DRB1*04:52            | DRB1*04:03:01 | DRB1*04:03:03 | DRB1*04:181   |                |               |             |             |  |
| 13              | 4                 | DRB1*13:128           | DRB1*13:02:01 | DRB1*13:02:08 | DRB1*13:109   |                |               |             |             |  |
| 17              | 1                 | DRB1*11:02:01         |               |               |               |                |               |             |             |  |
| 19              | 8                 | DRB1*13:190           | DRB1*13:01:01 | DRB1*13:01:08 | DRB1*13:105   | DRB1*13:112    | DRB1*13:117   | DRB1*13:166 | DRB1*13:186 |  |
| 20              | 3                 | DRB1*08:59            | DRB1*08:04:01 | DRB1*08:04:04 |               |                |               |             |             |  |
| 21              | 1                 | DRB1*13:04            |               |               |               |                |               |             |             |  |
| 23              | 2                 | DRB1*10:01:04         | DRB1*10:01:01 |               |               |                |               |             |             |  |
| 26              | 3                 | DRB1*04:05:04         | DRB1*04:05:01 | DRB1*04:05:03 |               |                |               |             |             |  |
| 27              | 7                 | DRB1*11:97            | DRB1*11:01:01 | DRB1*11:01:02 | DRB1*11:01:06 | DRB1*11:01:08  | DRB1*11:01:21 | DRB1*11:100 |             |  |
| 34              | 1                 | DRB1*08:06            |               |               |               |                |               |             |             |  |
| 35              | 3                 | DRB1*16:35            | DRB1*16:02:01 | DRB1*16:22    |               |                |               |             |             |  |
| 37              | 4                 | DRB1*12:17            | DRB1*12:01:01 | DRB1*12:06    | DRB1*12:10    |                |               |             |             |  |
| 38              | 3                 | DRB1*09:21            | DRB1*09:01:02 | DRB1*09:09    |               |                |               |             |             |  |
| 39              | 8                 | DRB1*14:54:01         | DRB1*14:01:01 | DRB1*14:01:04 | DRB1*14:113   | DRB1*14:114    | DRB1*14:125   | DRB1*14:142 | DRB1*14:157 |  |
| 49              | 8                 | DRB1*01:71            | DRB1*01:01:01 | DRB1*01:01:05 | DRB1*01:01:25 | DRB1*01:01:29  | DRB1*01:50    | DRB1*01:63  | DRB1*01:67  |  |
| 53              | 1                 | DRB1*11:02:01         |               |               |               |                |               |             |             |  |
| 54              | 8                 | DRB1*13:190           | DRB1*13:01:01 | DRB1*13:01:08 | DRB1*13:105   | DRB1*13:112    | DRB1*13:117   | DRB1*13:166 | DRB1*13:186 |  |
| 57              | 1                 | DRB1*03:02:01         |               |               |               |                |               |             |             |  |
| 58              | 7                 | DRB1*11:97            | DRB1*11:01:01 | DRB1*11:01:02 | DRB1*11:01:06 | DRB1*11:01:08  | DRB1*11:01:21 | DRB1*11:100 |             |  |
| 59              | 1                 | DRB1*03:02:01         |               |               |               |                |               |             |             |  |
| 60              | 1                 | DRB1*08:06            |               |               |               |                |               |             |             |  |

Locus DQA1

| Sequence Number | Number of alleles | Corresponding alleles |                  |                  |                  |                  |                  |                  |                  |  |
|-----------------|-------------------|-----------------------|------------------|------------------|------------------|------------------|------------------|------------------|------------------|--|
| 3               | 14                | DQA1*05:11            | DQA1*05:01:01:01 | DQA1*05:01:01:02 | DQA1*05:01:01:03 | DQA1*05:03       | DQA1*05:05:01:01 | DQA1*05:05:01:02 | DQA1*05:05:01:03 |  |
| 4               | 8                 | DQA1*05:05:01:04      | DQA1*05:05:01:05 | DQA1*05:06       | DQA1*05:07       | DQA1*05:08       | DQA1*05:09       |                  |                  |  |
| 5               | 8                 | DQA1*01:11            | DQA1*01:02:01:01 | DQA1*01:02:01:02 | DQA1*01:02:01:03 | DQA1*01:02:01:04 | DQA1*01:02:02    | DQA1*01:02:03    | DQA1*01:02:04    |  |
| 6               | 4                 | DQA1*04:02            | DQA1*04:01:01    | DQA1*04:01:02:01 | DQA1*04:01:02:02 |                  |                  |                  |                  |  |
| 7               | 12                | DQA1*01:07Q           | DQA1*01:01:01:01 | DQA1*01:01:01:02 | DQA1*01:01:01:03 | DQA1*01:01:02    | DQA1*01:04:01:01 | DQA1*01:04:01:02 | DQA1*01:04:01:03 |  |
| 8               | 6                 | DQA1*03:03:02         | DQA1*03:01:01    | DQA1*03:02       | DQA1*03:03:01:01 | DQA1*03:03:01:02 | DQA1*03:03:01:03 |                  |                  |  |
| 9               | 7                 | DQA1*01:10            | DQA1*01:03:01:01 | DQA1*01:03:01:02 | DQA1*01:03:01:03 | DQA1*01:03:01:04 | DQA1*01:03:01:05 | DQA1*01:03:01:06 |                  |  |
| 11              | 12                | DQA1*01:07Q           | DQA1*01:01:01:01 | DQA1*01:01:01:02 | DQA1*01:01:01:03 | DQA1*01:01:02    | DQA1*01:04:01:01 | DQA1*01:04:01:02 | DQA1*01:04:01:03 |  |
|                 |                   | DQA1*01:04:01:04      | DQA1*01:04:02    | DQA1*01:05:01    | DQA1*01:05:02    |                  |                  |                  |                  |  |

Locus DQB1

| Sequence Number | Number of alleles | Corresponding alleles |               |               |               |               |                |               |               |  |
|-----------------|-------------------|-----------------------|---------------|---------------|---------------|---------------|----------------|---------------|---------------|--|
| 1               | 16                | DQB1*02:02:01         | DQB1*02:01:01 | DQB1*02:01:08 | DQB1*02:01:10 | DQB1*02:02:02 | DQB1*02:04     | DQB1*02:06    | DQB1*02:09    |  |
| 2               | 35                | DQB1*02:10            | DQB1*02:12    | DQB1*02:20N   | DQB1*02:29    | DQB1*02:34    | DQB1*02:48     | DQB1*02:59    | DQB1*02:61    |  |
|                 |                   | DQB1*03:01:01         | DQB1*03:01:04 | DQB1*03:01:05 | DQB1*03:01:09 | DQB1*03:01:10 | DQB1*03:01:11  | DQB1*03:01:12 | DQB1*03:01:20 |  |
|                 |                   | DQB1*03:01:26         | DQB1*03:09    | DQB1*03:115   | DQB1*03:116   | DQB1*03:120   | DQB1*03:127    | DQB1*03:150   | DQB1*03:157   |  |
|                 |                   | DQB1*03:158           | DQB1*03:164   | DQB1*03:165   | DQB1*03:169   | DQB1*03:182   | DQB1*03:19     | DQB1*03:191   | DQB1*03:21    |  |
|                 |                   | DQB1*03:22            | DQB1*03:24    | DQB1*03:29    | DQB1*03:35    | DQB1*03:42    | DQB1*03:49     | DQB1*03:50    | DQB1*03:51    |  |
|                 |                   | DQB1*03:52            | DQB1*03:84N   | DQB1*03:94    |               |               |                |               |               |  |
| 4               | 8                 | DQB1*03:02:01         | DQB1*03:02:09 | DQB1*03:02:12 | DQB1*03:02:17 | DQB1*03:106   | DQB1*03:190    | DQB1*03:32    | DQB1*03:85    |  |
| 5               | 9                 | DQB1*05:01:01         | DQB1*05:18    | DQB1*05:27    | DQB1*05:31    | DQB1*05:32    | DQB1*05:45     | DQB1*05:62    | DQB1*05:74    |  |
|                 |                   | DQB1*05:84            |               |               |               |               |                |               |               |  |
| 6               | 17                | DQB1*05:102           | DQB1*05:02:01 | DQB1*05:02:03 | DQB1*05:02:07 | DQB1*05:02:11 | DQB1*05:14     | DQB1*05:17    | DQB1*05:35    |  |
|                 |                   | DQB1*05:36            | DQB1*05:37    | DQB1*05:46    | DQB1*05:47    | DQB1*05:57    | DQB1*05:79     | DQB1*05:83    | DQB1*05:87Q   |  |
|                 |                   | DQB1*05:90N           |               |               |               |               |                |               |               |  |
| 7               | 18                | DQB1*06:02:01         | DQB1*06:02:04 | DQB1*06:02:12 | DQB1*06:02:23 | DQB1*06:109   | DQB1*06:111:01 | DQB1*06:111   | DQB1*06:112N  |  |
|                 |                   | DQB1*06:115           | DQB1*06:116   | DQB1*06:117   | DQB1*06:127   | DQB1*06:131   | DQB1*06:175    | DQB1*06:176   | DQB1*06:47    |  |
|                 |                   | DQB1*06:72            | DQB1*06:84    |               |               |               |                |               |               |  |
| 8               | 3                 | DQB1*06:09:01         | DQB1*06:22:02 | DQB1*06:88    |               |               |                |               |               |  |
| 9               | 4                 | DQB1*04:23            | DQB1*04:02:01 | DQB1*04:04    | DQB1*04:13    |               |                |               |               |  |
| 10              | 5                 | DQB1*06:03:01         | DQB1*06:110   | DQB1*06:14:01 | DQB1*06:41    | DQB1*06:44    |                |               |               |  |
| 11              | 8                 | DQB1*06:86            | DQB1*06:04:01 | DQB1*06:34    | DQB1*06:36    | DQB1*06:38    | DQB1*06:39     | DQB1*06:52    | DQB1*06:69    |  |
| 13              | 12                | DQB1*05:03:01         | DQB1*05:03:03 | DQB1*05:03:04 | DQB1*05:03:09 | DQB1*05:08    | DQB1*05:10     | DQB1*05:38    | DQB1*05:41N   |  |
|                 |                   | DQB1*05:42            | DQB1*05:56    | DQB1*05:78    | DQB1*05:96    |               |                |               |               |  |

Locus DPB1

| Sequence Number | Number of alleles | Corresponding alleles |               |               |             |
|-----------------|-------------------|-----------------------|---------------|---------------|-------------|
| 1               | 4                 | DPB1*460:01           | DPB1*168:01   | DPB1*17:01    | DPB1*131:01 |
| 3               | 3                 | DPB1*463:01           | DPB1*105:01   | DPB1*04:02:01 |             |
| 4               | 7                 | DPB1*459:01           | DPB1*415:01   | DPB1*350:01   | DPB1*126:01 |
| 5               | 3                 | DPB1*133:01           | DPB1*13:01:01 | DPB1*107:01   |             |
| 12              | 5                 | DPB1*351:01           | DPB1*124:01   | DPB1*03:01:08 | DPB1*104:01 |
| 13              | 6                 | DPB1*461:01           | DPB1*416:01   | DPB1*414:01   | DPB1*352:01 |
| 15              | 1                 | DPB1*15:01:01         |               |               |             |
| 16              | 1                 | DPB1*40:01            |               |               |             |
| 19              | 3                 | DPB1*462:01           | DPB1*417:01   | DPB1*01:01:01 |             |
| 21              | 1                 | DPB1*10:01            |               |               |             |
| 27              | 1                 | DPB1*11:01:01         |               |               |             |
| 47              | 2                 | DPB1*162:01           | DPB1*01:01:02 |               |             |
| 48              | 1                 | DPB1*39:01            |               |               |             |
| 74              | 1                 | DPB1*85:01            |               |               |             |
