# Supplementary material for: Deciphering the fine nucleotide diversity of full HLA class I and class II genes in a well‐documented population from sub‐Saharan Africa
Source: PubMed Central journal article supplement (PMC5767763; doi:10.1111/tan.13180), 2017-12-25
Supplement: TAN-91-36-s003.pdf [file TAN-91-36-s003.pdf]

## Supplementary Information S07

### Potential donors for the DRB1\*13:04 allelic conversion

List of all potential donors for the allelic conversion proposed to generate DRB1\*13:04. *Upstream* and *Downstream* correspond to the number of identical nucleotides between the donor and DRB1\*11:02:01, the recipient, upstream and downstream the 6pb long fragment.

| Allele        | Number of conserved nucleotides |            | Fragment size |
|---------------|---------------------------------|------------|---------------|
|               | Upstream                        | Downstream |               |
| DRB1*13:154   | 158                             | 39         | 197           |
| DRB1*13:66:01 | 158                             | 39         | 197           |
| DRB1*13:66:02 | 158                             | 39         | 197           |
| DRB1*13:30    | 155                             | 39         | 194           |
| DRB1*13:169   | 158                             | 25         | 183           |
| DRB1*13:21:01 | 158                             | 25         | 183           |
| DRB1*13:21:02 | 158                             | 25         | 183           |
| DRB1*13:75    | 158                             | 25         | 183           |
| DRB1*13:93    | 61                              | 114        | 175           |
| DRB1*08:37    | 126                             | 39         | 165           |
| DRB1*08:17    | 126                             | 25         | 151           |
| DRB1*13:139   | 61                              | 87         | 148           |
| DRB1*13:32    | 30                              | 114        | 144           |
| DRB1*13:48    | 30                              | 114        | 144           |
| DRB1*04:106   | 30                              | 87         | 117           |
| DRB1*13:38    | 30                              | 87         | 117           |
| DRB1*13:65    | 30                              | 87         | 117           |
| DRB1*04:147   | 73                              | 25         | 98            |
| DRB1*04:28    | 73                              | 25         | 98            |
| DRB1*12:46    | 58                              | 39         | 97            |
| DRB1*15:12    | 60                              | 33         | 93            |
| DRB1*03:12    | 61                              | 25         | 86            |
| DRB1*14:65    | 60                              | 25         | 85            |
| DRB1*04:12    | 30                              | 39         | 69            |
| DRB1*04:136   | 30                              | 39         | 69            |
| DRB1*04:86    | 30                              | 39         | 69            |
| DRB1*08:03:02 | 30                              | 39         | 69            |
| DRB1*08:03:03 | 30                              | 39         | 69            |
| DRB1*08:03:04 | 30                              | 39         | 69            |
| DRB1*08:03:05 | 30                              | 39         | 69            |
| DRB1*08:03:06 | 30                              | 39         | 69            |
| DRB1*08:10    | 30                              | 39         | 69            |
| DRB1*08:12    | 30                              | 39         | 69            |
| DRB1*08:14    | 30                              | 39         | 69            |
| DRB1*08:18    | 30                              | 39         | 69            |

|               |    |    |    |
|---------------|----|----|----|
| DRB1*08:23    | 30 | 39 | 69 |
| DRB1*08:27    | 30 | 39 | 69 |
| DRB1*08:29    | 30 | 39 | 69 |
| DRB1*08:32    | 30 | 39 | 69 |
| DRB1*08:35    | 30 | 39 | 69 |
| DRB1*08:36:01 | 30 | 39 | 69 |
| DRB1*08:36:02 | 30 | 39 | 69 |
| DRB1*08:38    | 30 | 39 | 69 |
| DRB1*08:40    | 30 | 39 | 69 |
| DRB1*08:46    | 30 | 39 | 69 |
| DRB1*08:53    | 30 | 39 | 69 |
| DRB1*08:56    | 30 | 39 | 69 |
| DRB1*08:58    | 30 | 39 | 69 |
| DRB1*08:60N   | 30 | 39 | 69 |
| DRB1*08:62    | 30 | 39 | 69 |
| DRB1*08:65    | 30 | 39 | 69 |
| DRB1*08:66    | 30 | 39 | 69 |
| DRB1*08:68    | 30 | 39 | 69 |
| DRB1*08:71    | 30 | 39 | 69 |
| DRB1*08:74    | 30 | 39 | 69 |
| DRB1*13:03:01 | 30 | 39 | 69 |
| DRB1*13:03:02 | 30 | 39 | 69 |
| DRB1*13:03:05 | 30 | 39 | 69 |
| DRB1*13:03:06 | 30 | 39 | 69 |
| DRB1*13:101   | 30 | 39 | 69 |
| DRB1*13:115   | 30 | 39 | 69 |
| DRB1*13:12:01 | 30 | 39 | 69 |
| DRB1*13:12:02 | 30 | 39 | 69 |
| DRB1*13:12:03 | 30 | 39 | 69 |
| DRB1*13:12:04 | 30 | 39 | 69 |
| DRB1*13:120   | 30 | 39 | 69 |
| DRB1*13:13    | 30 | 39 | 69 |
| DRB1*13:151   | 30 | 39 | 69 |
| DRB1*13:152   | 30 | 39 | 69 |
| DRB1*13:167   | 30 | 39 | 69 |
| DRB1*13:174   | 30 | 39 | 69 |
| DRB1*13:188   | 30 | 39 | 69 |
| DRB1*13:194   | 30 | 39 | 69 |
| DRB1*13:216   | 30 | 39 | 69 |
| DRB1*13:219   | 30 | 39 | 69 |
| DRB1*13:33:01 | 30 | 39 | 69 |
| DRB1*13:33:02 | 30 | 39 | 69 |
| DRB1*13:33:03 | 30 | 39 | 69 |
| DRB1*13:58    | 30 | 39 | 69 |
| DRB1*13:81    | 30 | 39 | 69 |
| DRB1*13:89    | 30 | 39 | 69 |

|                |    |    |    |
|----------------|----|----|----|
| DRB1*13:94:01  | 30 | 39 | 69 |
| DRB1*13:94:02  | 30 | 39 | 69 |
| DRB1*13:95     | 30 | 39 | 69 |
| DRB1*14:63     | 30 | 39 | 69 |
| DRB1*14:78     | 30 | 39 | 69 |
| DRB1*13:133    | 30 | 38 | 68 |
| DRB1*08:33     | 28 | 39 | 67 |
| DRB1*13:161    | 27 | 39 | 66 |
| DRB1*04:107    | 30 | 33 | 63 |
| DRB1*04:125    | 30 | 33 | 63 |
| DRB1*13:03:03  | 23 | 39 | 62 |
| DRB1*13:118    | 18 | 39 | 57 |
| DRB1*01:66     | 30 | 25 | 55 |
| DRB1*04:05:01  | 30 | 25 | 55 |
| DRB1*04:05:02  | 30 | 25 | 55 |
| DRB1*04:05:03  | 30 | 25 | 55 |
| DRB1*04:05:04  | 30 | 25 | 55 |
| DRB1*04:05:07  | 30 | 25 | 55 |
| DRB1*04:05:08  | 30 | 25 | 55 |
| DRB1*04:05:09  | 30 | 25 | 55 |
| DRB1*04:05:10  | 30 | 25 | 55 |
| DRB1*04:05:11  | 30 | 25 | 55 |
| DRB1*04:05:13  | 30 | 25 | 55 |
| DRB1*04:05:14  | 30 | 25 | 55 |
| DRB1*04:05:15  | 30 | 25 | 55 |
| DRB1*04:05:16  | 30 | 25 | 55 |
| DRB1*04:05:17  | 30 | 25 | 55 |
| DRB1*04:09     | 30 | 25 | 55 |
| DRB1*04:10:01  | 30 | 25 | 55 |
| DRB1*04:10:02  | 30 | 25 | 55 |
| DRB1*04:10:03  | 30 | 25 | 55 |
| DRB1*04:103    | 30 | 25 | 55 |
| DRB1*04:104    | 30 | 25 | 55 |
| DRB1*04:11:01  | 30 | 25 | 55 |
| DRB1*04:116    | 30 | 25 | 55 |
| DRB1*04:126    | 30 | 25 | 55 |
| DRB1*04:131:01 | 30 | 25 | 55 |
| DRB1*04:131:02 | 30 | 25 | 55 |
| DRB1*04:137    | 30 | 25 | 55 |
| DRB1*04:152    | 30 | 25 | 55 |
| DRB1*04:17:01  | 30 | 25 | 55 |
| DRB1*04:17:02  | 30 | 25 | 55 |
| DRB1*04:173    | 30 | 25 | 55 |
| DRB1*04:178N   | 30 | 25 | 55 |
| DRB1*04:191    | 30 | 25 | 55 |
| DRB1*04:201    | 30 | 25 | 55 |

|               |    |    |    |
|---------------|----|----|----|
| DRB1*04:202   | 30 | 25 | 55 |
| DRB1*04:203   | 30 | 25 | 55 |
| DRB1*04:207   | 30 | 25 | 55 |
| DRB1*04:213   | 30 | 25 | 55 |
| DRB1*04:214N  | 30 | 25 | 55 |
| DRB1*04:24    | 30 | 25 | 55 |
| DRB1*04:45    | 30 | 25 | 55 |
| DRB1*04:48    | 30 | 25 | 55 |
| DRB1*04:67    | 30 | 25 | 55 |
| DRB1*04:77    | 30 | 25 | 55 |
| DRB1*04:80    | 30 | 25 | 55 |
| DRB1*04:81N   | 30 | 25 | 55 |
| DRB1*04:83    | 30 | 25 | 55 |
| DRB1*04:84    | 30 | 25 | 55 |
| DRB1*04:87    | 30 | 25 | 55 |
| DRB1*04:89    | 30 | 25 | 55 |
| DRB1*04:90    | 30 | 25 | 55 |
| DRB1*04:91    | 30 | 25 | 55 |
| DRB1*08:01:01 | 30 | 25 | 55 |
| DRB1*08:01:02 | 30 | 25 | 55 |
| DRB1*08:01:04 | 30 | 25 | 55 |
| DRB1*08:01:05 | 30 | 25 | 55 |
| DRB1*08:01:06 | 30 | 25 | 55 |
| DRB1*08:05    | 30 | 25 | 55 |
| DRB1*08:06    | 30 | 25 | 55 |
| DRB1*08:16    | 30 | 25 | 55 |
| DRB1*08:22    | 30 | 25 | 55 |
| DRB1*08:26    | 30 | 25 | 55 |
| DRB1*08:39    | 30 | 25 | 55 |
| DRB1*08:43    | 30 | 25 | 55 |
| DRB1*08:48    | 30 | 25 | 55 |
| DRB1*08:50    | 30 | 25 | 55 |
| DRB1*08:54    | 30 | 25 | 55 |
| DRB1*08:55    | 30 | 25 | 55 |
| DRB1*08:64    | 30 | 25 | 55 |
| DRB1*08:70    | 30 | 25 | 55 |
| DRB1*08:77    | 30 | 25 | 55 |
| DRB1*08:79    | 30 | 25 | 55 |
| DRB1*10:05    | 30 | 25 | 55 |
| DRB1*13:108   | 30 | 25 | 55 |
| DRB1*13:134   | 30 | 25 | 55 |
| DRB1*13:164   | 30 | 25 | 55 |
| DRB1*13:49    | 30 | 25 | 55 |
| DRB1*13:55    | 30 | 25 | 55 |
| DRB1*13:88    | 30 | 25 | 55 |
| DRB1*14:13    | 30 | 25 | 55 |

|               |    |    |    |
|---------------|----|----|----|
| DRB1*14:169   | 30 | 25 | 55 |
| DRB1*14:170   | 30 | 25 | 55 |
| DRB1*14:85    | 30 | 25 | 55 |
| DRB1*04:05:05 | 28 | 25 | 53 |
| DRB1*04:162   | 27 | 25 | 52 |
| DRB1*04:11:02 | 26 | 25 | 51 |
| DRB1*04:11:04 | 26 | 25 | 51 |
| DRB1*04:30    | 24 | 25 | 49 |
| DRB1*08:76    | 30 | 19 | 49 |
| DRB1*13:03:04 | 8  | 39 | 47 |
| DRB1*08:78N   | 30 | 16 | 46 |
| DRB1*04:29    | 18 | 25 | 43 |
| DRB1*13:90    | 2  | 39 | 41 |
| DRB1*08:49    | 30 | 9  | 39 |
| DRB1*08:61    | 30 | 7  | 37 |
| DRB1*08:47    | 30 | 5  | 35 |
| DRB1*09:08    | 30 | 5  | 35 |
| DRB1*04:57    | 30 | 4  | 34 |
| DRB1*08:51    | 30 | 2  | 32 |
| DRB1*13:122   | 30 | 2  | 32 |
| DRB1*08:69    | 30 | 1  | 31 |
| DRB1*04:05:06 | 1  | 25 | 26 |

---
