# Supplementary material for: Deciphering the fine nucleotide diversity of full HLA class I and class II genes in a well‐documented population from sub‐Saharan Africa
Source: PubMed Central journal article supplement (PMC5767763; doi:10.1111/tan.13180), 2017-12-25

## Supplementary Information S06

### Principal Component Analysis, axes 1 and 3

Principal component analysis (axes 1 and 3, explaining respectively 60% and 11% of the total variance) based on Tajima's  $D$ , nucleotide diversity  $\pi$ , frequency of segregating sites  $S$ .freq, number of non-synonymous  $dN$  and synonymous  $dS$  nucleotides at exons 2, 3 and 4 of loci HLA-A, -B, -C, -DRB1, -DQA1, -DQB1, -DPA1, -DPB1 and exons 5 of loci HLA-A, -B, -C. Symbols  $D$ ,  $D_1$ ,  $D_2$ ,  $D_3$  represent Tajima's  $D$  estimated on the whole gene region and at the 1st, 2nd and 3rd nucleotide of each codon, respectively. Similarly,  $\pi$ ,  $\pi_1$ ,  $\pi_2$  and  $\pi_3$  as well as  $S$ .freq,  $S$ .freq\_1,  $S$ .freq\_2 and  $S$ .freq\_3 represent the nucleotide diversity  $\pi$  and the frequency of segregating sites  $S$  estimated on the whole gene region and at nucleotide positions 1, 2 and 3 of each codon, respectively. Grey boxes correspond to ARS codons, white boxes to non-ARS codons. The inset graph at the bottom left represents the correlations between the projections of the variables (for each pair of variables, the correlation is measured by the cosine of the angle of the two variable vectors) on the plan of the PCA.

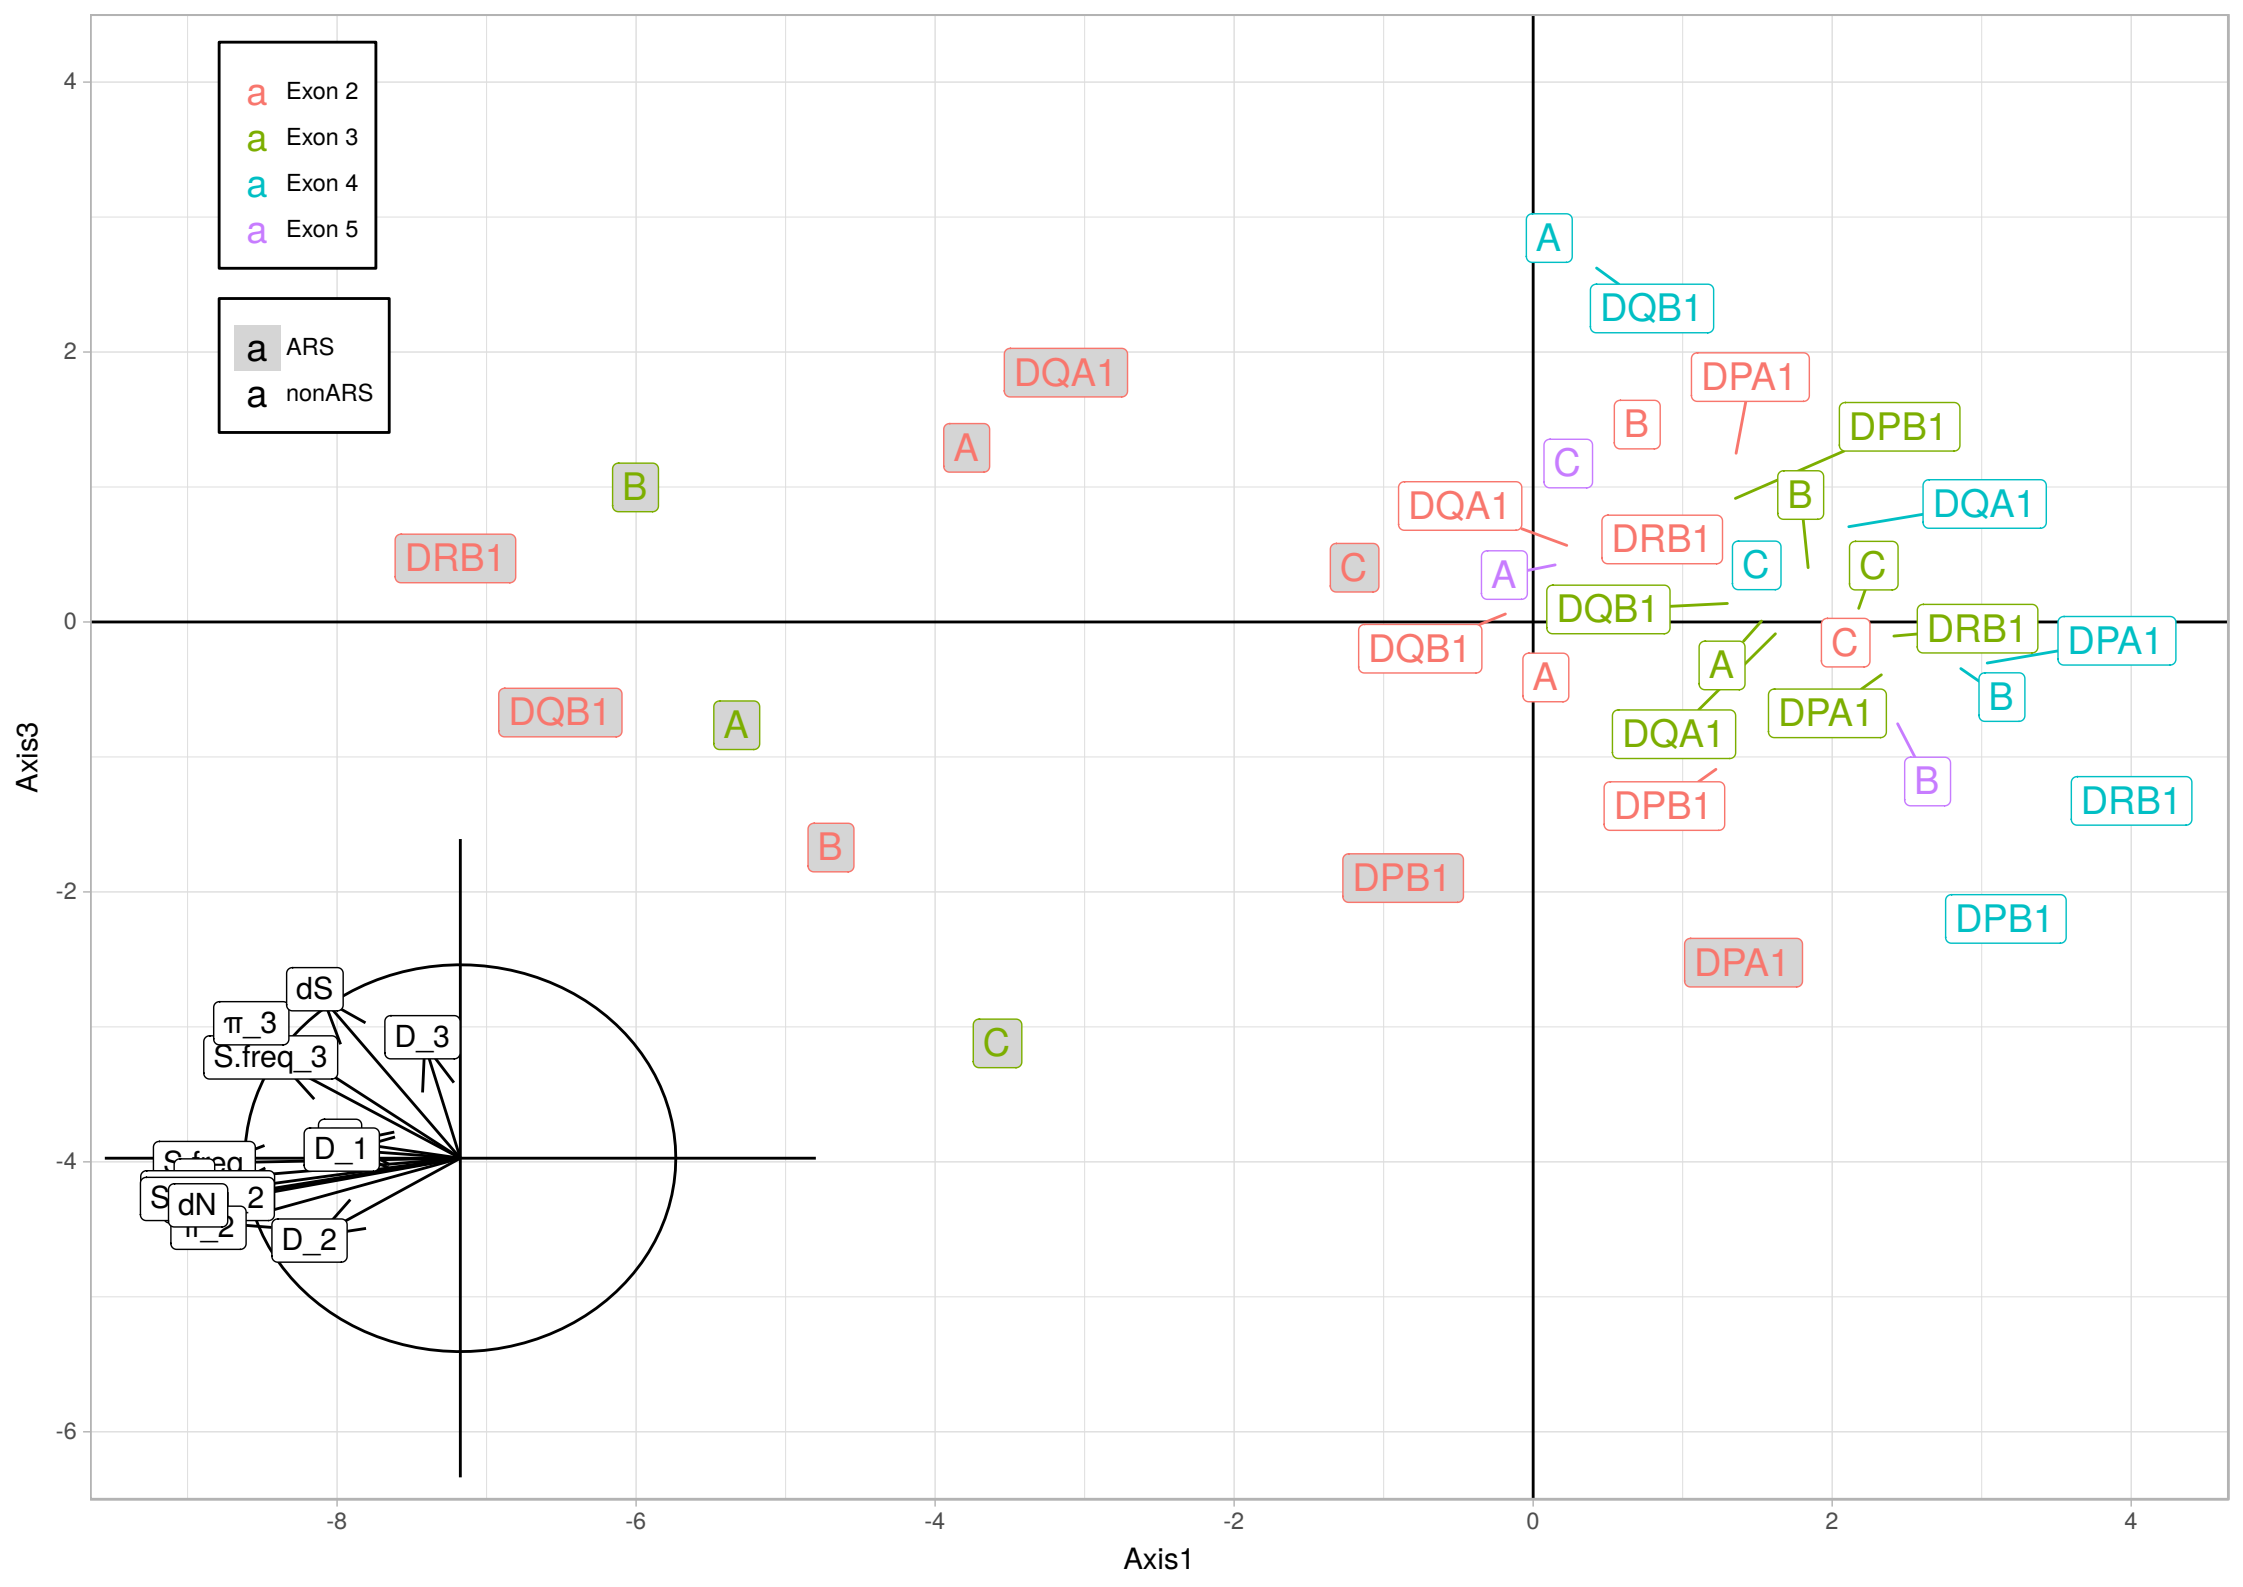

Supplement: TAN-91-36-s004.pdf [file TAN-91-36-s004.pdf]
