# Supplementary material for: Deciphering the fine nucleotide diversity of full HLA class I and class II genes in a well‐documented population from sub‐Saharan Africa
Source: PubMed Central journal article supplement (PMC5767763; doi:10.1111/tan.13180), 2017-12-25
Supplement: TAN-91-36-s005.pdf [file TAN-91-36-s005.pdf]

## Supplementary Information S02

### **Distribution of HLA allele or sequence frequencies and basic statistics based on PCR-SSO (left), NGS-454 (middle) and NGS-MiSeq (right) typings in the Mandenka population**

All frequencies and statistics have been estimated using the Gene[RATE] computer tools (<http://hla-net.eu/tools/>).

When a given locus has not been typed by a given technique, the corresponding column has been left empty.

For NGS-454, sequence numbers correspond to the lists of possible alleles given in **Supplementary Information S03**.

# PCR-SSO

# NGS-454

# NGS-MiSeq

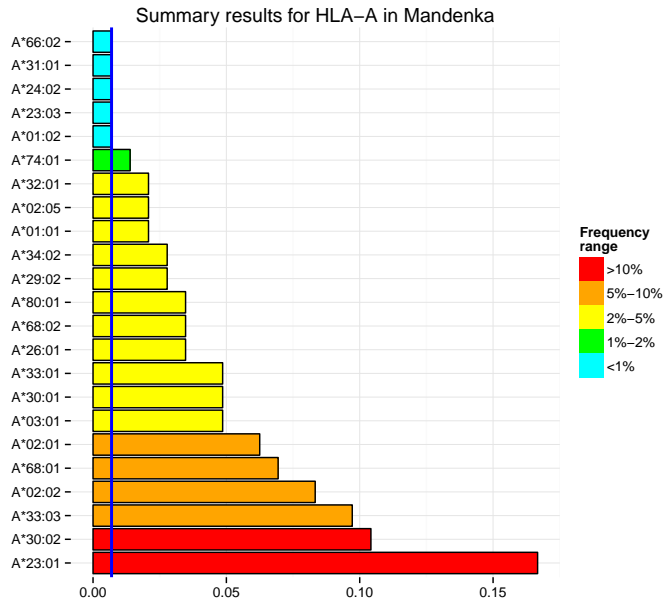

Sample size: 72

Estimated heterozygosity: 0.9223

Hardy-Weinberg equilibrium test p-value: 0.7857777

Ewens-Watterson-Slatkin neutrality test: FDR p.adj min: 0.007 max: 0.382

Follows the complete list of alleles, including those with lower and null frequencies not shown before.

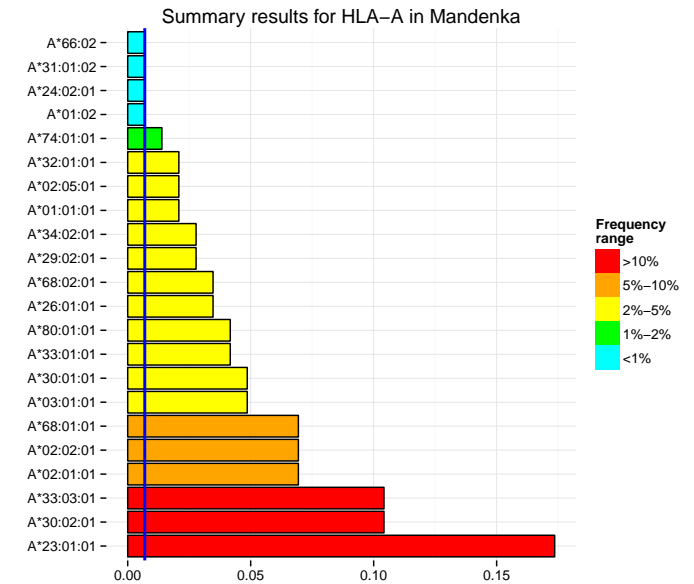

Sample size: 72

Estimated heterozygosity: 0.9199

Hardy-Weinberg equilibrium test p-value: 0.3310911

Ewens-Watterson-Slatkin neutrality test: FDR p.adj min: 0.005 max: 0.452

Follows the complete list of alleles, including those with lower and null frequencies not shown before.

# PCR-SSO

# NGS-454

# NGS-MiSeq

|    | Allele or Haplotype Name | Frequency Estimate |
|----|--------------------------|--------------------|
| 1  | A*23:03                  | 0.0069             |
| 2  | A*66:02                  | 0.0069             |
| 3  | A*01:02                  | 0.0069             |
| 4  | A*31:01                  | 0.0069             |
| 5  | A*24:02                  | 0.0069             |
| 6  | A*74:01                  | 0.0139             |
| 7  | A*01:01                  | 0.0208             |
| 8  | A*32:01                  | 0.0208             |
| 9  | A*02:05                  | 0.0208             |
| 10 | A*29:02                  | 0.0278             |
| 11 | A*34:02                  | 0.0278             |
| 12 | A*68:02                  | 0.0347             |
| 13 | A*80:01                  | 0.0347             |
| 14 | A*26:01                  | 0.0347             |
| 15 | A*30:01                  | 0.0486             |
| 16 | A*33:01                  | 0.0486             |
| 17 | A*03:01                  | 0.0486             |
| 18 | A*02:01                  | 0.0625             |
| 19 | A*68:01                  | 0.0694             |
| 20 | A*02:02                  | 0.0833             |
| 21 | A*33:03                  | 0.0972             |
| 22 | A*30:02                  | 0.1042             |
| 23 | A*23:01                  | 0.1667             |

|    | Allele or Haplotype Name | Frequency Estimate |
|----|--------------------------|--------------------|
| 1  | A*66:02                  | 0.0069             |
| 2  | A*01:02                  | 0.0069             |
| 3  | A*31:01:02               | 0.0069             |
| 4  | A*24:02:01               | 0.0069             |
| 5  | A*74:01:01               | 0.0139             |
| 6  | A*01:01:01               | 0.0208             |
| 7  | A*32:01:01               | 0.0208             |
| 8  | A*02:05:01               | 0.0208             |
| 9  | A*29:02:01               | 0.0278             |
| 10 | A*34:02:01               | 0.0278             |
| 11 | A*68:02:01               | 0.0347             |
| 12 | A*26:01:01               | 0.0347             |
| 13 | A*33:01:01               | 0.0417             |
| 14 | A*80:01:01               | 0.0417             |
| 15 | A*30:01:01               | 0.0486             |
| 16 | A*03:01:01               | 0.0486             |
| 17 | A*68:01:01               | 0.0694             |
| 18 | A*02:01:01               | 0.0694             |
| 19 | A*02:02:01               | 0.0694             |
| 20 | A*30:02:01               | 0.1042             |
| 21 | A*33:03:01               | 0.1042             |
| 22 | A*23:01:01               | 0.1736             |

# PCR-SSO

# NGS-454

# NGS-MiSeq

Summary results for HLA-B in Mandenka

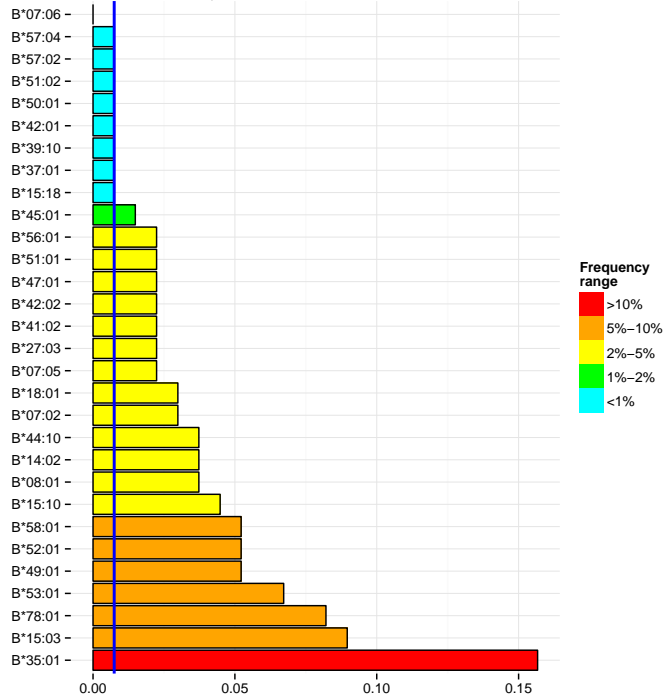

Sample size: 67

Estimated heterozygosity: 0.9358

Hardy-Weinberg equilibrium test p-value: 1

Ewens-Watterson-Slatkin neutrality test: FDR p.adj min: 0.008 max: 0.562

Follows the complete list of alleles, including those with lower and null frequencies not shown before.

Summary results for HLA-B in Mandenka

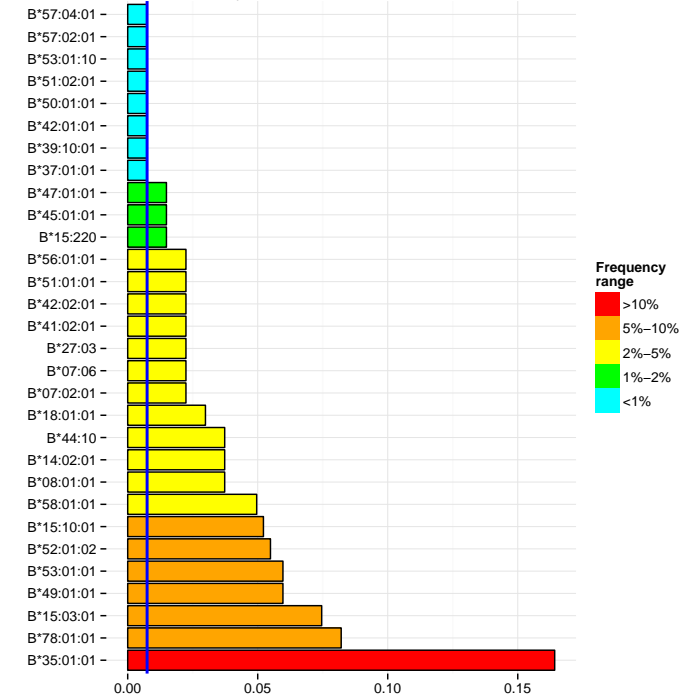

Sample size: 67

Estimated heterozygosity: 0.9357

Hardy-Weinberg equilibrium test p-value: 0.5237272

Ewens-Watterson-Slatkin neutrality test: FDR p.adj min: 0.013 max: 0.684

Follows the complete list of alleles, including those with lower and null frequencies not shown before.

# PCR-SSO

# NGS-454

# NGS-MiSeq

|    | Allele or Haplotype Name | Frequency Estimate |
|----|--------------------------|--------------------|
| 1  | B*07:06                  | 0.0000             |
| 2  | B*15:18                  | 0.0075             |
| 3  | B*37:01                  | 0.0075             |
| 4  | B*39:10                  | 0.0075             |
| 5  | B*50:01                  | 0.0075             |
| 6  | B*57:02                  | 0.0075             |
| 7  | B*42:01                  | 0.0075             |
| 8  | B*51:02                  | 0.0075             |
| 9  | B*57:04                  | 0.0075             |
| 10 | B*45:01                  | 0.0149             |
| 11 | B*07:05                  | 0.0224             |
| 12 | B*41:02                  | 0.0224             |
| 13 | B*42:02                  | 0.0224             |
| 14 | B*47:01                  | 0.0224             |
| 15 | B*51:01                  | 0.0224             |
| 16 | B*56:01                  | 0.0224             |
| 17 | B*27:03                  | 0.0224             |
| 18 | B*07:02                  | 0.0299             |
| 19 | B*18:01                  | 0.0299             |
| 20 | B*14:02                  | 0.0373             |
| 21 | B*44:10                  | 0.0373             |
| 22 | B*08:01                  | 0.0373             |
| 23 | B*15:10                  | 0.0448             |
| 24 | B*49:01                  | 0.0522             |
| 25 | B*58:01                  | 0.0522             |
| 26 | B*52:01                  | 0.0522             |
| 27 | B*53:01                  | 0.0672             |
| 28 | B*78:01                  | 0.0821             |
| 29 | B*15:03                  | 0.0896             |
| 30 | B*35:01                  | 0.1567             |

|    | Allele or Haplotype Name | Frequency Estimate |
|----|--------------------------|--------------------|
| 1  | B*37:01:01               | 0.0075             |
| 2  | B*39:10:01               | 0.0075             |
| 3  | B*50:01:01               | 0.0075             |
| 4  | B*57:02:01               | 0.0075             |
| 5  | B*53:01:10               | 0.0075             |
| 6  | B*42:01:01               | 0.0075             |
| 7  | B*51:02:01               | 0.0075             |
| 8  | B*57:04:01               | 0.0075             |
| 9  | B*15:220                 | 0.0149             |
| 10 | B*45:01:01               | 0.0149             |
| 11 | B*47:01:01               | 0.0149             |
| 12 | B*07:06                  | 0.0224             |
| 13 | B*41:02:01               | 0.0224             |
| 14 | B*42:02:01               | 0.0224             |
| 15 | B*07:02:01               | 0.0224             |
| 16 | B*51:01:01               | 0.0224             |
| 17 | B*56:01:01               | 0.0224             |
| 18 | B*27:03                  | 0.0224             |
| 19 | B*18:01:01               | 0.0299             |
| 20 | B*14:02:01               | 0.0373             |
| 21 | B*44:10                  | 0.0373             |
| 22 | B*08:01:01               | 0.0373             |
| 23 | B*58:01:01               | 0.0496             |
| 24 | B*15:10:01               | 0.0522             |
| 25 | B*52:01:02               | 0.0549             |
| 26 | B*53:01:01               | 0.0597             |
| 27 | B*49:01:01               | 0.0597             |
| 28 | B*15:03:01               | 0.0746             |
| 29 | B*78:01:01               | 0.0821             |
| 30 | B*35:01:01               | 0.1642             |

# PCR-SSO

# NGS-454

# NGS-MiSeq

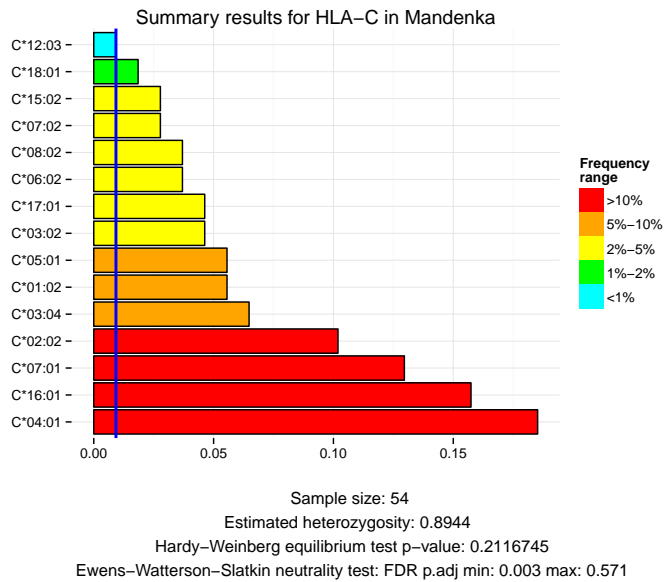

Follows the complete list of alleles, including those with lower and null frequencies not shown before.

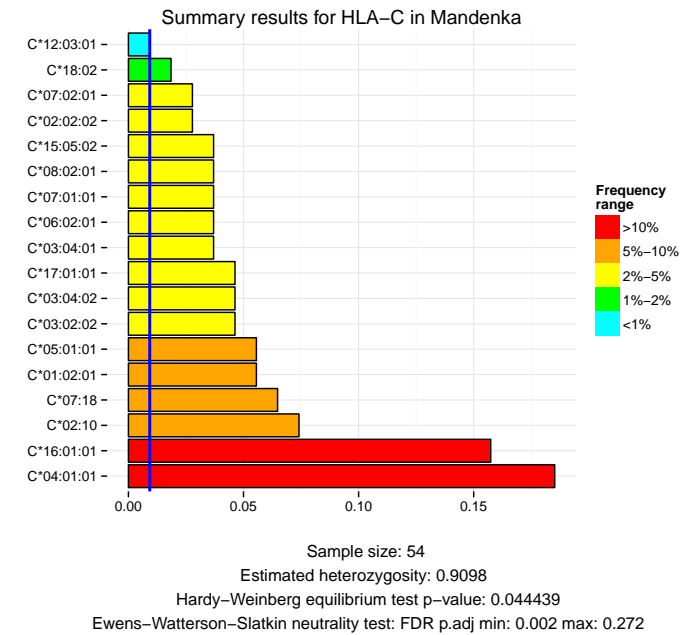

Follows the complete list of alleles, including those with lower and null frequencies not shown before.

# PCR-SSO

# NGS-454

# NGS-MiSeq

|    | Allele or Haplotype Name | Frequency Estimate |
|----|--------------------------|--------------------|
| 1  | C*12:03                  | 0.0093             |
| 2  | C*18:01                  | 0.0185             |
| 3  | C*15:02                  | 0.0278             |
| 4  | C*07:02                  | 0.0278             |
| 5  | C*08:02                  | 0.0370             |
| 6  | C*06:02                  | 0.0370             |
| 7  | C*17:01                  | 0.0463             |
| 8  | C*03:02                  | 0.0463             |
| 9  | C*01:02                  | 0.0556             |
| 10 | C*05:01                  | 0.0556             |
| 11 | C*03:04                  | 0.0648             |
| 12 | C*02:02                  | 0.1019             |
| 13 | C*07:01                  | 0.1296             |
| 14 | C*16:01                  | 0.1574             |
| 15 | C*04:01                  | 0.1852             |

|    | Allele or Haplotype Name | Frequency Estimate |
|----|--------------------------|--------------------|
| 1  | C*12:03:01               | 0.0093             |
| 2  | C*18:02                  | 0.0185             |
| 3  | C*02:02:02               | 0.0278             |
| 4  | C*07:02:01               | 0.0278             |
| 5  | C*08:02:01               | 0.0370             |
| 6  | C*15:05:02               | 0.0370             |
| 7  | C*03:04:01               | 0.0370             |
| 8  | C*06:02:01               | 0.0370             |
| 9  | C*07:01:01               | 0.0370             |
| 10 | C*17:01:01               | 0.0463             |
| 11 | C*03:02:02               | 0.0463             |
| 12 | C*03:04:02               | 0.0463             |
| 13 | C*01:02:01               | 0.0556             |
| 14 | C*05:01:01               | 0.0556             |
| 15 | C*07:18                  | 0.0648             |
| 16 | C*02:10                  | 0.0741             |
| 17 | C*16:01:01               | 0.1574             |
| 18 | C*04:01:01               | 0.1852             |

# PCR-SSO

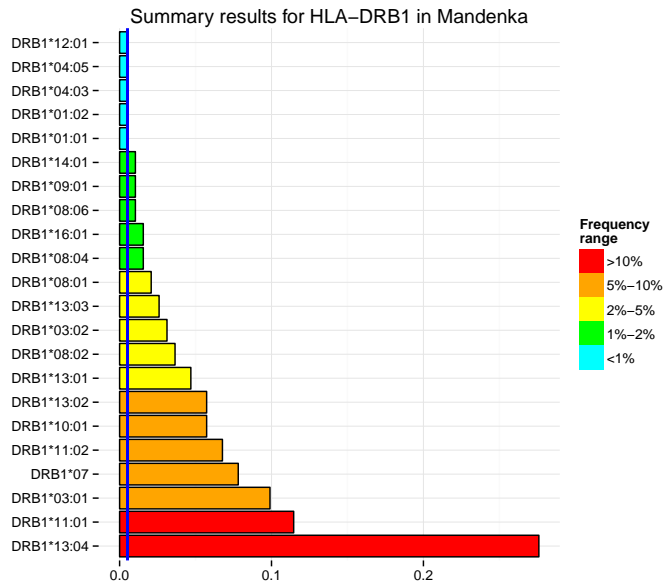

Sample size: 96

Estimated heterozygosity: 0.8771

Hardy-Weinberg equilibrium test p-value: 0.1631775

Ewens-Watterson-Slatkin neutrality test: FDR p.adj min: 0.213 max: 0.736

Follows the complete list of alleles, including those with lower and null frequencies not shown before.

# NGS-454

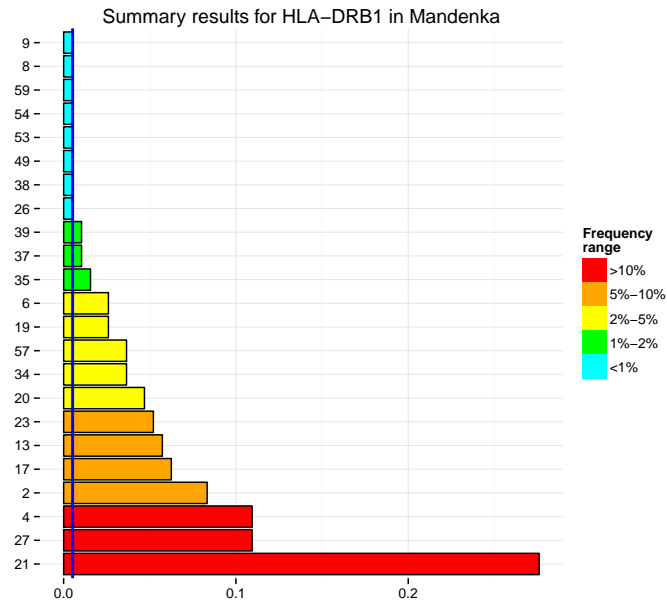

Sample size: 96

Estimated heterozygosity: 0.8762

Hardy-Weinberg equilibrium test p-value: 0.8979362

Ewens-Watterson-Slatkin neutrality test: FDR p.adj min: 0.317 max: 0.673

Follows the complete list of alleles, including those with lower and null frequencies not shown before.

# NGS-MiSeq

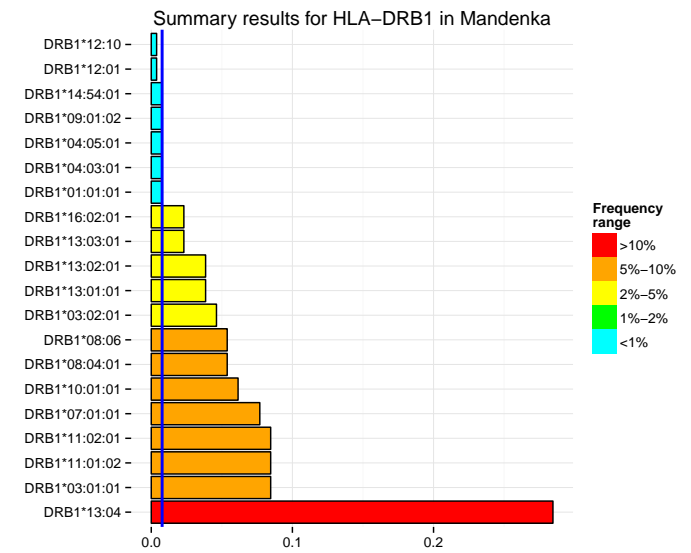

Sample size: 65

Estimated heterozygosity: 0.8756

Hardy-Weinberg equilibrium test p-value: 0.08938847

Ewens-Watterson-Slatkin neutrality test: FDR p.adj min: 0.050 max: 0.671

Follows the complete list of alleles, including those with lower and null frequencies not shown before.



## PCR-SSO

|    | Allele or Haplotype Name | Frequency Estimate |
|----|--------------------------|--------------------|
| 1  | DRB1*01:02               | 0.0052             |
| 2  | DRB1*04:05               | 0.0052             |
| 3  | DRB1*04:03               | 0.0052             |
| 4  | DRB1*01:01               | 0.0052             |
| 5  | DRB1*12:01               | 0.0052             |
| 6  | DRB1*09:01               | 0.0104             |
| 7  | DRB1*08:06               | 0.0104             |
| 8  | DRB1*14:01               | 0.0104             |
| 9  | DRB1*16:01               | 0.0156             |
| 10 | DRB1*08:04               | 0.0156             |
| 11 | DRB1*08:01               | 0.0208             |
| 12 | DRB1*13:03               | 0.0260             |
| 13 | DRB1*03:02               | 0.0312             |
| 14 | DRB1*08:02               | 0.0365             |
| 15 | DRB1*13:01               | 0.0469             |
| 16 | DRB1*13:02               | 0.0573             |
| 17 | DRB1*10:01               | 0.0573             |
| 18 | DRB1*11:02               | 0.0677             |
| 19 | DRB1*07                  | 0.0781             |
| 20 | DRB1*03:01               | 0.0990             |
| 21 | DRB1*11:01               | 0.1146             |
| 22 | DRB1*13:04               | 0.2760             |

## NGS-454

|    | Allele or Haplotype Name | Frequency Estimate |
|----|--------------------------|--------------------|
| 1  | 8                        | 0.0052             |
| 2  | 26                       | 0.0052             |
| 3  | 9                        | 0.0052             |
| 4  | 38                       | 0.0052             |
| 5  | 49                       | 0.0052             |
| 6  | 53                       | 0.0052             |
| 7  | 54                       | 0.0052             |
| 8  | 59                       | 0.0052             |
| 9  | 37                       | 0.0104             |
| 10 | 39                       | 0.0104             |
| 11 | 35                       | 0.0156             |
| 12 | 6                        | 0.0260             |
| 13 | 19                       | 0.0260             |
| 14 | 34                       | 0.0365             |
| 15 | 57                       | 0.0365             |
| 16 | 20                       | 0.0469             |
| 17 | 23                       | 0.0521             |
| 18 | 13                       | 0.0573             |
| 19 | 17                       | 0.0625             |
| 20 | 2                        | 0.0833             |
| 21 | 4                        | 0.1094             |
| 22 | 27                       | 0.1094             |
| 23 | 21                       | 0.2760             |

## NGS-MiSeq

|    | Allele or Haplotype Name | Frequency Estimate |
|----|--------------------------|--------------------|
| 1  | DRB1*12:10               | 0.0038             |
| 2  | DRB1*12:01               | 0.0038             |
| 3  | DRB1*01:01:01            | 0.0077             |
| 4  | DRB1*04:05:01            | 0.0077             |
| 5  | DRB1*04:03:01            | 0.0077             |
| 6  | DRB1*09:01:02            | 0.0077             |
| 7  | DRB1*14:54:01            | 0.0077             |
| 8  | DRB1*16:02:01            | 0.0231             |
| 9  | DRB1*13:03:01            | 0.0231             |
| 10 | DRB1*13:02:01            | 0.0385             |
| 11 | DRB1*13:01:01            | 0.0385             |
| 12 | DRB1*03:02:01            | 0.0462             |
| 13 | DRB1*08:04:01            | 0.0538             |
| 14 | DRB1*08:06               | 0.0538             |
| 15 | DRB1*10:01:01            | 0.0615             |
| 16 | DRB1*07:01:01            | 0.0769             |
| 17 | DRB1*03:01:01            | 0.0846             |
| 18 | DRB1*11:02:01            | 0.0846             |
| 19 | DRB1*11:01:02            | 0.0846             |
| 20 | DRB1*13:04               | 0.2846             |

# PCR-SSO

# NGS-454

# NGS-MiSeq

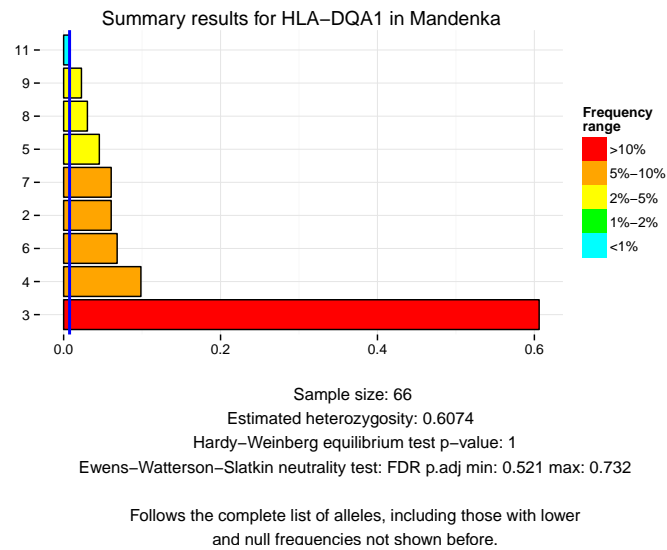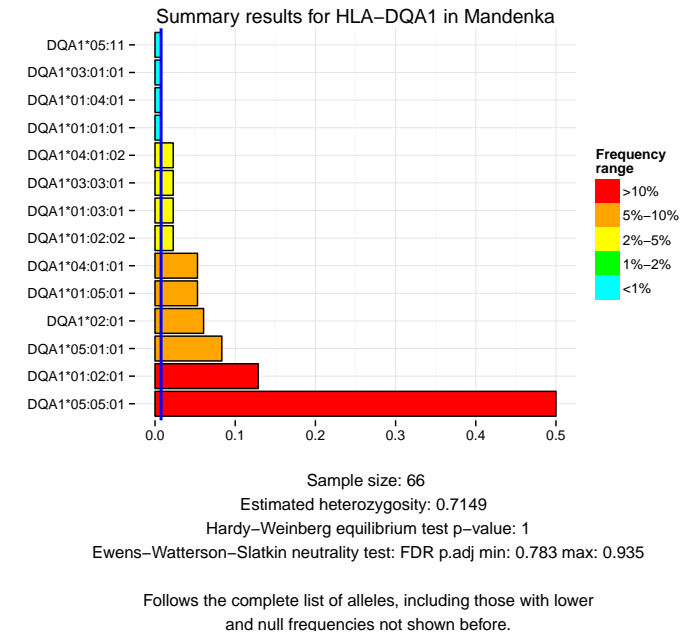

# PCR-SSO

# NGS-454

# NGS-MiSeq

|   | Allele or Haplotype Name | Frequency Estimate |
|---|--------------------------|--------------------|
| 1 | 11                       | 0.0076             |
| 2 | 9                        | 0.0227             |
| 3 | 8                        | 0.0303             |
| 4 | 5                        | 0.0455             |
| 5 | 2                        | 0.0606             |
| 6 | 7                        | 0.0606             |
| 7 | 6                        | 0.0682             |
| 8 | 4                        | 0.0985             |
| 9 | 3                        | 0.6061             |

|    | Allele or Haplotype Name | Frequency Estimate |
|----|--------------------------|--------------------|
| 1  | DQA1*05:11               | 0.0076             |
| 2  | DQA1*03:01:01            | 0.0076             |
| 3  | DQA1*01:01:01            | 0.0076             |
| 4  | DQA1*01:04:01            | 0.0076             |
| 5  | DQA1*03:03:01            | 0.0227             |
| 6  | DQA1*01:02:02            | 0.0227             |
| 7  | DQA1*01:03:01            | 0.0227             |
| 8  | DQA1*04:01:02            | 0.0227             |
| 9  | DQA1*01:05:01            | 0.0530             |
| 10 | DQA1*04:01:01            | 0.0530             |
| 11 | DQA1*02:01               | 0.0606             |
| 12 | DQA1*05:01:01            | 0.0833             |
| 13 | DQA1*01:02:01            | 0.1288             |
| 14 | DQA1*05:05:01            | 0.5000             |

# PCR-SSO

# NGS-454

# NGS-MiSeq

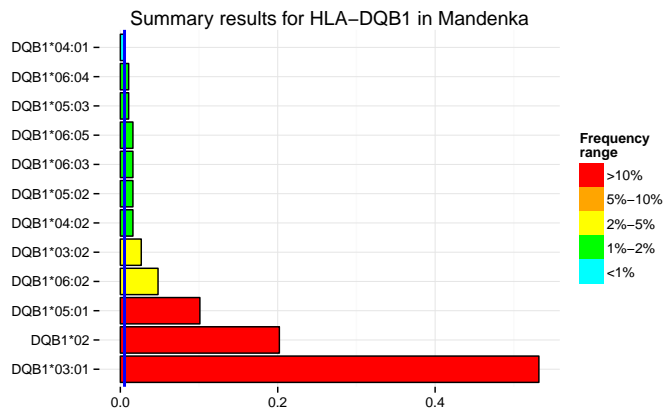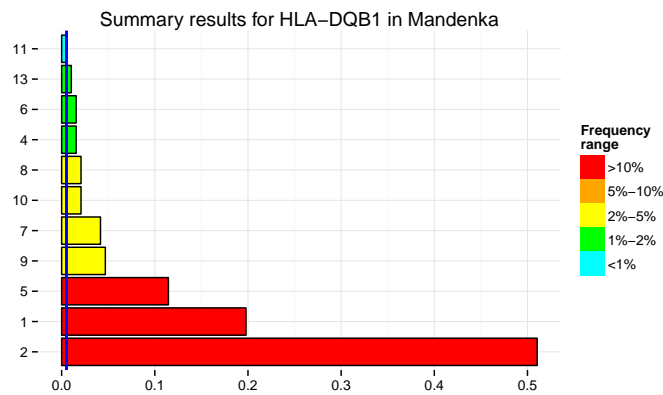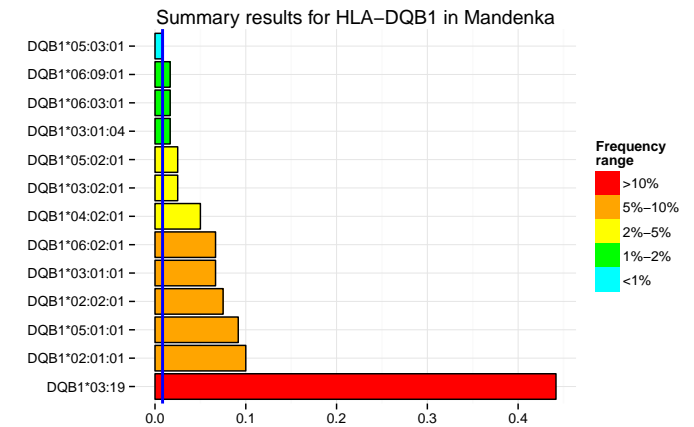

Sample size: 94  
 Estimated heterozygosity: 0.6617  
 Hardy-Weinberg equilibrium test p-value: 0.7363483  
 Ewens-Watterson-Slatkin neutrality test: FDR p.adj min: 0.897 max: 0.969

Sample size: 96  
 Estimated heterozygosity: 0.6818  
 Hardy-Weinberg equilibrium test p-value: 1  
 Ewens-Watterson-Slatkin neutrality test: FDR p.adj min: 0.712 max: 0.900

Sample size: 60  
 Estimated heterozygosity: 0.7673  
 Hardy-Weinberg equilibrium test p-value: 1  
 Ewens-Watterson-Slatkin neutrality test: FDR p.adj min: 0.425 max: 0.870

Follows the complete list of alleles, including those with lower and null frequencies not shown before.

Follows the complete list of alleles, including those with lower and null frequencies not shown before.

Follows the complete list of alleles, including those with lower and null frequencies not shown before.

## PCR-SSO

|    | Allele or Haplotype Name | Frequency Estimate |
|----|--------------------------|--------------------|
| 1  | DQB1*04:01               | 0.0053             |
| 2  | DQB1*05:03               | 0.0106             |
| 3  | DQB1*06:04               | 0.0106             |
| 4  | DQB1*04:02               | 0.0160             |
| 5  | DQB1*06:03               | 0.0160             |
| 6  | DQB1*05:02               | 0.0160             |
| 7  | DQB1*06:05               | 0.0160             |
| 8  | DQB1*03:02               | 0.0266             |
| 9  | DQB1*06:02               | 0.0479             |
| 10 | DQB1*05:01               | 0.1011             |
| 11 | DQB1*02                  | 0.2021             |
| 12 | DQB1*03:01               | 0.5319             |

## NGS-454

|    | Allele or Haplotype Name | Frequency Estimate |
|----|--------------------------|--------------------|
| 1  | 11                       | 0.0052             |
| 2  | 13                       | 0.0104             |
| 3  | 4                        | 0.0156             |
| 4  | 6                        | 0.0156             |
| 5  | 8                        | 0.0208             |
| 6  | 10                       | 0.0208             |
| 7  | 7                        | 0.0417             |
| 8  | 9                        | 0.0469             |
| 9  | 5                        | 0.1146             |
| 10 | 1                        | 0.1979             |
| 11 | 2                        | 0.5104             |

## NGS-MiSeq

|    | Allele or Haplotype Name | Frequency Estimate |
|----|--------------------------|--------------------|
| 1  | DQB1*05:03:01            | 0.0083             |
| 2  | DQB1*03:01:04            | 0.0167             |
| 3  | DQB1*06:09:01            | 0.0167             |
| 4  | DQB1*06:03:01            | 0.0167             |
| 5  | DQB1*03:02:01            | 0.0250             |
| 6  | DQB1*05:02:01            | 0.0250             |
| 7  | DQB1*04:02:01            | 0.0500             |
| 8  | DQB1*03:01:01            | 0.0667             |
| 9  | DQB1*06:02:01            | 0.0667             |
| 10 | DQB1*02:02:01            | 0.0750             |
| 11 | DQB1*05:01:01            | 0.0917             |
| 12 | DQB1*02:01:01            | 0.1000             |
| 13 | DQB1*03:19               | 0.4417             |

PCR-SSO

NGS-454

NGS-MiSeq

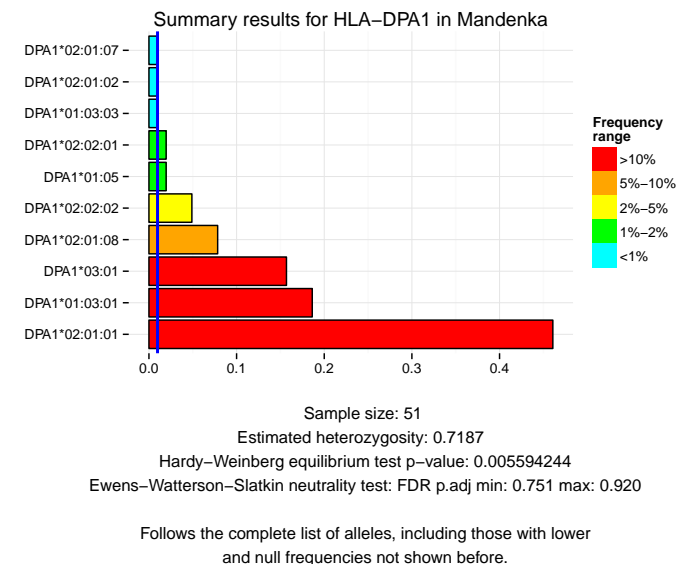

PCR-SSO

NGS-454

NGS-MiSeq

|    | Allele or Haplotype Name | Frequency Estimate |
|----|--------------------------|--------------------|
| 1  | DPA1*01:03:03            | 0.0098             |
| 2  | DPA1*02:01:07            | 0.0098             |
| 3  | DPA1*02:01:02            | 0.0098             |
| 4  | DPA1*01:05               | 0.0196             |
| 5  | DPA1*02:02:01            | 0.0196             |
| 6  | DPA1*02:02:02            | 0.0490             |
| 7  | DPA1*02:01:08            | 0.0784             |
| 8  | DPA1*03:01               | 0.1569             |
| 9  | DPA1*01:03:01            | 0.1863             |
| 10 | DPA1*02:01:01            | 0.4608             |

# PCR-SSO

# NGS-454

# NGS-MiSeq

Summary results for HLA-DPB1 in Mandenka

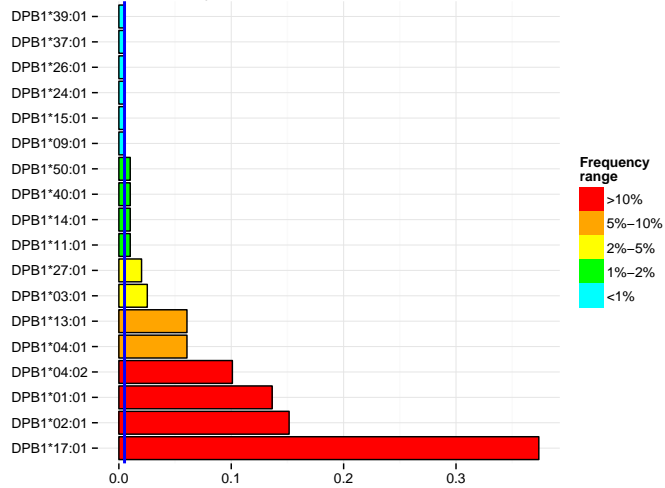

Sample size: 99

Estimated heterozygosity: 0.7996

Hardy-Weinberg equilibrium test p-value: 0.6708691

Ewens-Watterson-Slatkin neutrality test: FDR p.adj min: 0.863 max: 0.975

Follows the complete list of alleles, including those with lower and null frequencies not shown before.

Summary results for HLA-DPB1 in Mandenka

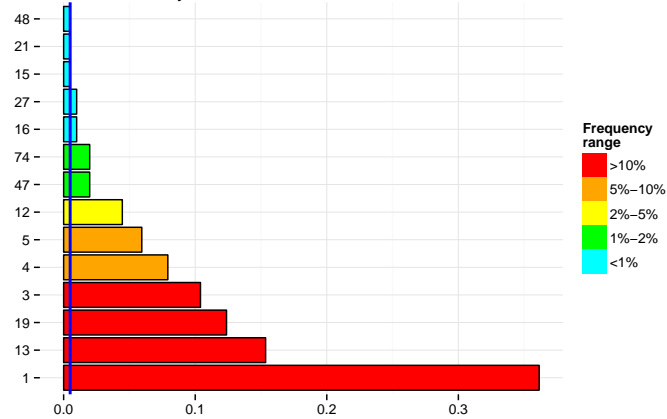

Sample size: 101

Estimated heterozygosity: 0.8068

Hardy-Weinberg equilibrium test p-value: 1

Ewens-Watterson-Slatkin neutrality test: FDR p.adj min: 0.383 max: 0.686

Follows the complete list of alleles, including those with lower and null frequencies not shown before.

Summary results for HLA-DPB1 in Mandenka

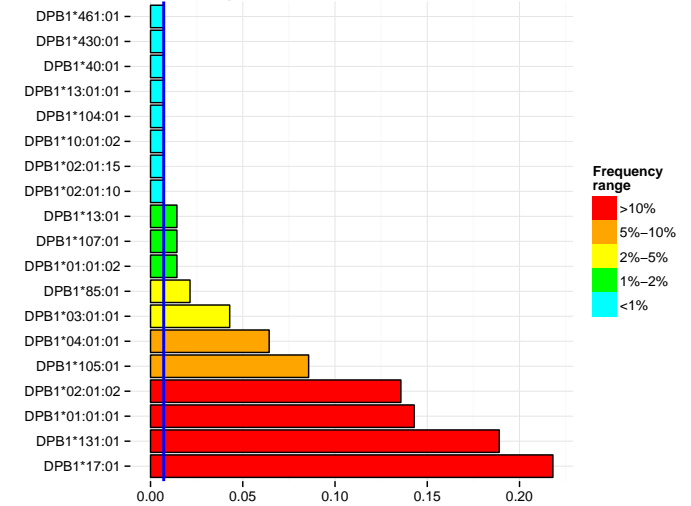

Sample size: 70

Estimated heterozygosity: 0.8631

Hardy-Weinberg equilibrium test p-value: 0.0551156

Ewens-Watterson-Slatkin neutrality test: FDR p.adj min: 0.719 max: 0.897

Follows the complete list of alleles, including those with lower and null frequencies not shown before.



# PCR-SSO

# NGS-454

# NGS-MiSeq

|    | Allele or Haplotype Name | Frequency Estimate |
|----|--------------------------|--------------------|
| 1  | DPB1*15:01               | 0.0051             |
| 2  | DPB1*09:01               | 0.0051             |
| 3  | DPB1*24:01               | 0.0051             |
| 4  | DPB1*37:01               | 0.0051             |
| 5  | DPB1*39:01               | 0.0051             |
| 6  | DPB1*26:01               | 0.0051             |
| 7  | DPB1*11:01               | 0.0101             |
| 8  | DPB1*14:01               | 0.0101             |
| 9  | DPB1*40:01               | 0.0101             |
| 10 | DPB1*50:01               | 0.0101             |
| 11 | DPB1*27:01               | 0.0202             |
| 12 | DPB1*03:01               | 0.0253             |
| 13 | DPB1*04:01               | 0.0606             |
| 14 | DPB1*13:01               | 0.0606             |
| 15 | DPB1*04:02               | 0.1010             |
| 16 | DPB1*01:01               | 0.1364             |
| 17 | DPB1*02:01               | 0.1515             |
| 18 | DPB1*17:01               | 0.3737             |

|    | Allele or Haplotype Name | Frequency Estimate |
|----|--------------------------|--------------------|
| 1  | 15                       | 0.0050             |
| 2  | 21                       | 0.0050             |
| 3  | 48                       | 0.0050             |
| 4  | 16                       | 0.0099             |
| 5  | 27                       | 0.0099             |
| 6  | 47                       | 0.0198             |
| 7  | 74                       | 0.0198             |
| 8  | 12                       | 0.0446             |
| 9  | 5                        | 0.0594             |
| 10 | 4                        | 0.0792             |
| 11 | 3                        | 0.1040             |
| 12 | 19                       | 0.1238             |
| 13 | 13                       | 0.1535             |
| 14 | 1                        | 0.3614             |

|    | Allele or Haplotype Name | Frequency Estimate |
|----|--------------------------|--------------------|
| 1  | DPB1*02:01:15            | 0.0071             |
| 2  | DPB1*104:01              | 0.0071             |
| 3  | DPB1*13:01:01            | 0.0071             |
| 4  | DPB1*02:01:10            | 0.0071             |
| 5  | DPB1*10:01:02            | 0.0071             |
| 6  | DPB1*40:01               | 0.0071             |
| 7  | DPB1*430:01              | 0.0071             |
| 8  | DPB1*461:01              | 0.0071             |
| 9  | DPB1*01:01:02            | 0.0143             |
| 10 | DPB1*107:01              | 0.0143             |
| 11 | DPB1*13:01               | 0.0143             |
| 12 | DPB1*85:01               | 0.0214             |
| 13 | DPB1*03:01:01            | 0.0429             |
| 14 | DPB1*04:01:01            | 0.0643             |
| 15 | DPB1*105:01              | 0.0857             |
| 16 | DPB1*02:01:02            | 0.1357             |
| 17 | DPB1*01:01:01            | 0.1429             |
| 18 | DPB1*131:01              | 0.1890             |
| 19 | DPB1*17:01               | 0.2181             |
