# Supplementary material for: Deciphering the fine nucleotide diversity of full HLA class I and class II genes in a well‐documented population from sub‐Saharan Africa
Source: PubMed Central journal article supplement (PMC5767763; doi:10.1111/tan.13180), 2017-12-25
Supplement: TAN-91-36-s006.pdf [file TAN-91-36-s006.pdf]

## Supplementary Information S05

Statistics computed for the assessment of selective neutrality in each gene region

| Locus    | Gene region     | $\pi \pm sd$  | S  | Tajima's D | pVal        | adj.pVal        | dN     | dS     | dN/dS   | Z            | N seq / N tot |
|----------|-----------------|---------------|----|------------|-------------|-----------------|--------|--------|---------|--------------|---------------|
| HLA-A    | Exon1           | 0.022 ± 0.014 | 8  | 0,30       | 0,66        | 0,75            | 0,0201 | 0,0284 | 0,7075  | -0,33        | 174 / 174     |
| HLA-B    | Exon1           | 0.047 ± 0.027 | 12 | 1,54       | 0,94        | 0,24            | 0,0483 | 0,0541 | 0,8933  | -0,16        | 166 / 166     |
| HLA-C    | Exon1           | 0.023 ± 0.015 | 6  | 1,21       | 0,88        | 0,41            | 0,0249 | 0,0000 | nan     | nan          | 163 / 166     |
| HLA-DPA1 | Exon1           | 0             | 0  | nan        | nan         | nan             | nan    | nan    | nan     | nan          | 102 / 102     |
| HLA-DQA1 | Exon1           | 0.027 ± 0.017 | 7  | 1,70       | 0,96        | 0,20            | 0,0205 | 0,0507 | 0,4044  | -0,86        | 158 / 164     |
| HLA-DQB1 | Exon1           | 0.036 ± 0.02  | 14 | 1,37       | 0,93        | 0,28            | 0,0337 | 0,0491 | 0,6871  | -0,47        | 138 / 154     |
| HLA-DRB1 | Exon1           | 0.014 ± 0.01  | 8  | -0,34      | 0,43        | 0,86            | 0,0151 | 0,0128 | 1,1850  | 0,39         | 82 / 162      |
| HLA-A    | Exon2           | 0.046 ± 0.023 | 81 | -0,42      | 0,37        | 0,80            | 0,0505 | 0,0428 | 1,1786  | 0,43         | 172 / 174     |
| HLA-B    | Exon2           | 0.047 ± 0.023 | 42 | 2,02       | <b>0,99</b> | 0,09            | 0,0495 | 0,0458 | 1,0804  | 0,18         | 164 / 166     |
| HLA-C    | Exon2           | 0.025 ± 0.013 | 21 | 2,26       | <b>0,98</b> | 0,11            | 0,0248 | 0,0291 | 0,8529  | -0,29        | 164 / 166     |
| HLA-DPA1 | Exon2           | 0.02 ± 0.011  | 13 | 2,52       | <b>0,99</b> | 0,07            | 0,0151 | 0,0406 | 0,3724  | -1,16        | 102 / 102     |
| HLA-DPB1 | Exon2           | 0.031 ± 0.016 | 21 | 3,24       | <b>1,00</b> | <b>0,04</b>     | 0,0386 | 0,0103 | 3,7641  | <b>2,56</b>  | 166 / 166     |
| HLA-DQA1 | Exon2           | 0.062 ± 0.031 | 46 | 2,16       | <b>0,98</b> | 0,13            | 0,0565 | 0,0808 | 0,6992  | -0,88        | 156 / 164     |
| HLA-DQB1 | Exon2           | 0.064 ± 0.032 | 54 | 2,38       | <b>0,99</b> | 0,08            | 0,0720 | 0,0602 | 1,1956  | 0,55         | 152 / 154     |
| HLA-DRB1 | Exon2           | 0.062 ± 0.031 | 62 | 1,48       | 0,95        | 0,23            | 0,0689 | 0,0567 | 1,2162  | 0,57         | 141 / 162     |
| HLA-A    | Exon2 – ARS     | 0.083 ± 0.044 | 26 | 0,57       | 0,77        | 0,61            | 0,1050 | 0,0438 | 2,3940  | 1,19         | 172 / 174     |
| HLA-B    | Exon2 – ARS     | 0.111 ± 0.058 | 22 | 2,44       | <b>1,00</b> | 0,06            | 0,1603 | 0,0212 | 7,5661  | <b>3,15</b>  | 164 / 166     |
| HLA-C    | Exon2 – ARS     | 0.052 ± 0.03  | 9  | 2,72       | <b>1,00</b> | <b>0,04</b>     | 0,0642 | 0,0267 | 2,4078  | 1,16         | 164 / 166     |
| HLA-DPA1 | Exon2 – ARS     | 0.032 ± 0.02  | 6  | 1,49       | 0,91        | 0,33            | 0,0420 | 0,0017 | 25,3267 | 1,49         | 102 / 102     |
| HLA-DPB1 | Exon2 – ARS     | 0.05 ± 0.028  | 8  | 3,73       | <b>1,00</b> | <b>&lt;0,01</b> | 0,0674 | 0,0000 | nan     | nan          | 166 / 166     |
| HLA-DQA1 | Exon2 – ARS     | 0.072 ± 0.04  | 14 | 1,92       | 0,97        | 0,16            | 0,0797 | 0,0799 | 0,9977  | 0,00         | 156 / 164     |
| HLA-DQB1 | Exon2 – ARS     | 0.133 ± 0.068 | 31 | 2,33       | <b>0,99</b> | 0,06            | 0,1873 | 0,0742 | 2,5251  | 1,89         | 152 / 154     |
| HLA-DRB1 | Exon2 – ARS     | 0.137 ± 0.07  | 35 | 1,87       | 0,97        | 0,14            | 0,1841 | 0,0875 | 2,1049  | 1,53         | 144 / 162     |
| HLA-A    | Exon2 – non ARS | 0.034 ± 0.018 | 55 | -0,89      | 0,21        | 0,58            | 0,0333 | 0,0432 | 0,7701  | -0,55        | 172 / 174     |
| HLA-B    | Exon2 – non ARS | 0.026 ± 0.014 | 20 | 1,24       | 0,91        | 0,33            | 0,0175 | 0,0545 | 0,3216  | -1,57        | 164 / 166     |
| HLA-C    | Exon2 – non ARS | 0.016 ± 0.009 | 12 | 1,39       | 0,94        | 0,26            | 0,0124 | 0,0301 | 0,4124  | -1,04        | 164 / 166     |
| HLA-DPA1 | Exon2 – non ARS | 0.016 ± 0.009 | 7  | 2,73       | <b>1,00</b> | 0,06            | 0,0066 | 0,0537 | 0,1233  | -1,64        | 102 / 102     |
| HLA-DPB1 | Exon2 – non ARS | 0.023 ± 0.013 | 13 | 2,25       | <b>0,98</b> | 0,11            | 0,0271 | 0,0138 | 1,9596  | 1,29         | 166 / 166     |
| HLA-DQA1 | Exon2 – non ARS | 0.058 ± 0.03  | 32 | 2,05       | <b>0,99</b> | 0,10            | 0,0490 | 0,0820 | 0,5981  | -1,09        | 156 / 164     |
| HLA-DQB1 | Exon2 – non ARS | 0.037 ± 0.019 | 23 | 2,11       | <b>0,98</b> | 0,13            | 0,0337 | 0,0558 | 0,6033  | -0,99        | 154 / 154     |
| HLA-DRB1 | Exon2 – non ARS | 0.032 ± 0.017 | 27 | 0,76       | 0,81        | 0,54            | 0,0295 | 0,0461 | 0,6393  | -0,82        | 141 / 162     |
| HLA-A    | Exon3           | 0.039 ± 0.02  | 34 | 2,29       | <b>0,99</b> | 0,10            | 0,0442 | 0,0280 | 1,5795  | 1,21         | 172 / 174     |
| HLA-B    | Exon3           | 0.039 ± 0.02  | 37 | 1,82       | 0,96        | 0,20            | 0,0400 | 0,0401 | 0,9978  | -0,01        | 164 / 166     |
| HLA-C    | Exon3           | 0.03 ± 0.015  | 28 | 1,85       | 0,96        | 0,18            | 0,0301 | 0,0316 | 0,9530  | -0,10        | 164 / 166     |
| HLA-A    | Exon3 – ARS     | 0.114 ± 0.06  | 17 | 2,85       | <b>1,00</b> | <b>0,03</b>     | 0,1548 | 0,0421 | 3,6759  | <b>3,05</b>  | 172 / 174     |
| HLA-B    | Exon3 – ARS     | 0.124 ± 0.065 | 20 | 2,44       | <b>0,99</b> | 0,09            | 0,1622 | 0,0717 | 2,2616  | 1,32         | 164 / 166     |
| HLA-C    | Exon3 – ARS     | 0.094 ± 0.051 | 13 | 3,05       | <b>1,00</b> | <b>0,02</b>     | 0,1254 | 0,0281 | 4,4602  | <b>2,25</b>  | 164 / 166     |
| HLA-A    | Exon3 – non ARS | 0.02 ± 0.011  | 17 | 1,33       | 0,93        | 0,29            | 0,0194 | 0,0250 | 0,7764  | -0,40        | 172 / 174     |
| HLA-B    | Exon3 – non ARS | 0.018 ± 0.01  | 17 | 0,78       | 0,83        | 0,52            | 0,0129 | 0,0337 | 0,3839  | -1,42        | 164 / 166     |
| HLA-C    | Exon3 – non ARS | 0.014 ± 0.008 | 15 | 0,42       | 0,74        | 0,66            | 0,0080 | 0,0329 | 0,2421  | -1,76        | 164 / 166     |
| HLA-DPA1 | Exon3           | 0.011 ± 0.006 | 11 | 1,15       | 0,89        | 0,38            | 0,0067 | 0,0260 | 0,2573  | -1,52        | 102 / 102     |
| HLA-DPB1 | Exon3           | 0.013 ± 0.007 | 7  | 4,02       | <b>1,00</b> | <b>&lt;0,01</b> | 0,0047 | 0,0405 | 0,1164  | -1,84        | 166 / 166     |
| HLA-DQA1 | Exon3           | 0.016 ± 0.009 | 14 | 2,01       | <b>0,98</b> | 0,11            | 0,0142 | 0,0227 | 0,6246  | -0,71        | 156 / 164     |
| HLA-DQB1 | Exon3           | 0.02 ± 0.01   | 18 | 1,90       | <b>0,98</b> | 0,13            | 0,0145 | 0,0383 | 0,3787  | -1,53        | 154 / 154     |
| HLA-DRB1 | Exon3           | 0.013 ± 0.007 | 25 | -0,54      | 0,33        | 0,74            | 0,0089 | 0,0275 | 0,3224  | -1,93        | 153 / 162     |
| HLA-A    | Exon4           | 0.029 ± 0.015 | 23 | 2,73       | <b>0,99</b> | 0,06            | 0,0167 | 0,0758 | 0,2202  | <b>-2,62</b> | 172 / 174     |
| HLA-B    | Exon4           | 0.006 ± 0.004 | 7  | 0,81       | 0,81        | 0,54            | 0,0028 | 0,0172 | 0,1611  | -1,31        | 166 / 166     |
| HLA-C    | Exon4           | 0.018 ± 0.01  | 20 | 1,07       | 0,88        | 0,42            | 0,0133 | 0,0346 | 0,3843  | -1,61        | 166 / 166     |
| HLA-DPA1 | Exon4           | 0.006 ± 0.005 | 3  | 1,05       | 0,84        | 0,50            | 0,0046 | 0,0101 | 0,4566  | -0,49        | 102 / 102     |
| HLA-DPB1 | Exon4           | 0.005 ± 0.004 | 4  | -0,48      | 0,39        | 0,80            | 0,0064 | 0,0000 | nan     | nan          | 166 / 166     |
| HLA-DQA1 | Exon4           | 0.016 ± 0.01  | 13 | 0,14       | 0,61        | 0,80            | 0,0086 | 0,0372 | 0,2308  | -1,69        | 156 / 164     |
| HLA-DQB1 | Exon4           | 0.029 ± 0.017 | 9  | 2,24       | <b>0,98</b> | 0,13            | 0,0167 | 0,0750 | 0,2220  | -1,52        | 153 / 154     |
| HLA-DRB1 | Exon4           | 0.002 ± 0.003 | 2  | -0,57      | 0,33        | 0,73            | 0,0000 | 0,0079 | 0,0000  | -1,30        | 150 / 162     |
| HLA-A    | Exon5           | 0.037 ± 0.02  | 14 | 1,79       | 0,97        | 0,15            | 0,0378 | 0,0382 | 0,9879  | -0,02        | 172 / 174     |
| HLA-B    | Exon5           | 0.012 ± 0.008 | 6  | 0,66       | 0,80        | 0,57            | 0,0108 | 0,0163 | 0,6639  | -0,37        | 166 / 166     |
| HLA-C    | Exon5           | 0.033 ± 0.018 | 17 | 0,79       | 0,82        | 0,54            | 0,0302 | 0,0458 | 0,6582  | -0,74        | 166 / 166     |
| HLA-DPB1 | Exon5           | 0.007 ± 0.012 | 1  | -0,32      | 0,31        | 0,73            | 0,0000 | 0,0344 | 0,0000  | -0,78        | 92 / 166      |
| HLA-DQB1 | Exon5           | 0 ± 0         | 0  | nan        | nan         | nan             | nan    | nan    | nan     | nan          | 154 / 154     |
| HLA-DRB1 | Exon5           | 0.025 ± 0.022 | 2  | 0,78       | 0,82        | 0,54            | 0,0413 | 0,0000 | nan     | nan          | 87 / 162      |
| HLA-A    | Exon6           | 0.025 ± 0.02  | 3  | 0,98       | 0,85        | 0,48            | 0,0177 | 0,0532 | 0,3325  | -0,40        | 170 / 174     |
| HLA-B    | Exon6           | 0 ± 0         | 0  | nan        | nan         | nan             | nan    | nan    | nan     | nan          | 166 / 166     |
| HLA-C    | Exon6           | 0.003 ± 0.006 | 1  | -0,43      | 0,30        | 0,71            | 0,0047 | 0,0000 | nan     | nan          | 164 / 166     |
| HLA-DQB1 | Exon6           | 0.026 ± 0.028 | 1  | 0,98       | 0,87        | 0,42            | 0,0000 | 0,1870 | 0,0000  | -1,12        | 95 / 154      |
| HLA-DRB1 | Exon6           | 0.005 ± 0.011 | 2  | -1,31      | 0,05        | 0,20            | 0,0037 | 0,0467 | 0,0789  | -1,78        | 86 / 162      |
| HLA-A    | Exon7           | 0.01 ± 0.01   | 2  | 0,55       | 0,77        | 0,61            | 0,0116 | 0,0093 | 1,2398  | 0,14         | 170 / 174     |
| HLA-B    | Exon7           | 0.008 ± 0.009 | 1  | 1,14       | 0,89        | 0,38            | 0,0000 | 0,0000 | nan     | nan          | 166 / 166     |
| HLA-C    | Exon7           | 0.009 ± 0.009 | 2  | 0,30       | 0,68        | 0,73            | 0,0061 | 0,0000 | nan     | nan          | 161 / 166     |
| HLA-A    | Exon8           | 0 ± 0         | 0  | nan        | nan         | nan             | nan    | nan    | nan     | nan          | 170 / 174     |
| HLA-C    | Exon8           | 0 ± 0         | 0  | nan        | nan         | nan             | nan    | nan    | nan     | nan          | 165 / 166     |
| HLA-A    | Intron1         | 0.042 ± 0.023 | 14 | 3,02       | <b>1,00</b> | <b>&lt;0,01</b> | -      | -      | -       | -            | 138 / 174     |
| HLA-B    | Intron1         | 0.019 ± 0.012 | 18 | -0,64      | 0,29        | 0,71            | -      | -      | -       | -            | 157 / 166     |
| HLA-C    | Intron1         | 0.017 ± 0.01  | 10 | 0,53       | 0,75        | 0,64            | -      | -      | -       | -            | 164 / 166     |
| HLA-DPA1 | Intron1         | 0.002 ± 0.001 | 23 | 0,25       | 0,66        | 0,75            | -      | -      | -       | -            | 38 / 102      |
| HLA-DQB1 | Intron1         | 0.001 ± 0.001 | 4  | 1,65       | 0,97        | 0,17            | -      | -      | -       | -            | 23 / 154      |

|          |         |               |    |       |             |             |   |   |   |   |           |
|----------|---------|---------------|----|-------|-------------|-------------|---|---|---|---|-----------|
| HLA-A    | Intron2 | 0.027 ± 0.014 | 25 | 1,30  | 0,92        | 0,32        | - | - | - | - | 172 / 174 |
| HLA-B    | Intron2 | 0.01 ± 0.006  | 13 | 0,07  | 0,60        | 0,80        | - | - | - | - | 149 / 166 |
| HLA-C    | Intron2 | 0.012 ± 0.007 | 11 | 1,16  | 0,88        | 0,41        | - | - | - | - | 101 / 166 |
| HLA-DPA1 | Intron2 | 0.016 ± 0.009 | 17 | 1,87  | 0,97        | 0,15        | - | - | - | - | 102 / 102 |
| HLA-DPB1 | Intron2 | 0.001 ± 0     | 17 | -0,93 | 0,19        | 0,54        | - | - | - | - | 30 / 166  |
| HLA-DQA1 | Intron2 | 0.003 ± 0.002 | 4  | 0,38  | 0,69        | 0,73        | - | - | - | - | 36 / 164  |
| HLA-DQB1 | Intron2 | 0 ± 0         | 0  | nan   | nan         | nan         | - | - | - | - | 7 / 154   |
| HLA-A    | Intron3 | 0.018 ± 0.009 | 30 | 2,77  | <b>1,00</b> | 0,05        | - | - | - | - | 157 / 174 |
| HLA-B    | Intron3 | 0.003 ± 0.002 | 13 | -0,47 | 0,39        | 0,80        | - | - | - | - | 132 / 166 |
| HLA-C    | Intron3 | 0.013 ± 0.007 | 37 | 0,48  | 0,77        | 0,61        | - | - | - | - | 164 / 166 |
| HLA-DPA1 | Intron3 | 0.013 ± 0.008 | 7  | 2,44  | <b>0,99</b> | 0,08        | - | - | - | - | 102 / 102 |
| HLA-DPB1 | Intron3 | 0.013 ± 0.007 | 19 | 2,98  | <b>1,00</b> | 0,05        | - | - | - | - | 166 / 166 |
| HLA-DQB1 | Intron3 | 0.022 ± 0.011 | 33 | 2,36  | <b>0,99</b> | 0,09        | - | - | - | - | 103 / 154 |
| HLA-DRB1 | Intron3 | 0.024 ± 0.012 | 52 | 0,97  | 0,87        | 0,42        | - | - | - | - | 28 / 162  |
| HLA-A    | Intron4 | 0.002 ± 0.002 | 1  | -0,25 | 0,32        | 0,73        | - | - | - | - | 81 / 174  |
| HLA-B    | Intron4 | 0.011 ± 0.008 | 4  | 0,83  | 0,82        | 0,54        | - | - | - | - | 166 / 166 |
| HLA-C    | Intron4 | 0.03 ± 0.017  | 17 | 0,55  | 0,77        | 0,61        | - | - | - | - | 157 / 166 |
| HLA-DPB1 | Intron4 | 0.033 ± 0.017 | 25 | 3,68  | <b>1,00</b> | <b>0,00</b> | - | - | - | - | 98 / 166  |
| HLA-DQB1 | Intron4 | 0.018 ± 0.009 | 27 | 2,11  | <b>0,98</b> | 0,11        | - | - | - | - | 103 / 154 |
| HLA-A    | Intron5 | 0.017 ± 0.009 | 21 | 2,31  | <b>0,99</b> | 0,08        | - | - | - | - | 81 / 174  |
| HLA-B    | Intron5 | 0.008 ± 0.005 | 18 | 0,49  | 0,75        | 0,64        | - | - | - | - | 165 / 166 |
| HLA-C    | Intron5 | 0.005 ± 0.003 | 11 | 0,14  | 0,62        | 0,80        | - | - | - | - | 136 / 166 |
| HLA-DQB1 | Intron5 | 0.009 ± 0.005 | 21 | 0,86  | 0,83        | 0,53        | - | - | - | - | 60 / 154  |
| HLA-A    | Intron6 | 0.025 ± 0.014 | 18 | 0,33  | 0,68        | 0,73        | - | - | - | - | 170 / 174 |
| HLA-B    | Intron6 | 0.007 ± 0.006 | 5  | -0,37 | 0,40        | 0,80        | - | - | - | - | 161 / 166 |
| HLA-C    | Intron6 | 0.013 ± 0.009 | 6  | 0,65  | 0,77        | 0,61        | - | - | - | - | 166 / 166 |
| HLA-A    | Intron7 | 0.028 ± 0.015 | 14 | 2,30  | <b>0,99</b> | 0,07        | - | - | - | - | 132 / 174 |
| HLA-C    | Intron7 | 0.012 ± 0.008 | 10 | 0,34  | 0,73        | 0,68        | - | - | - | - | 149 / 166 |

Only sequences without gaps are considered here (at the exception of DQA1 exon 2 codon 56), the total number of sequences matching this criterion is reported in the last column along with the total number of sequences (N seq / N tot). Significant values ( $p < 0.05$ ) are in bold.  $\pi \pm sd$ : genetic diversity  $\pm 1$  standard deviation; S: number of observed segregating sites; pVal: p-value associated to Tajima's D tests for selective neutrality; adj.pVal: adjusted pValue (False Discovery Rate method) associated to Tajima's D tests for selective neutrality (as Tajima's test is a two tailed test, pValue were transformed before correction for multiple tests, see Material & Methods); dN: proportion of non-synonymous substitutions; dS: proportion of synonymous substitutions; dN/dS: ratio of non-synonymous to synonymous substitutions; Z: Z statistics assessing the significance of dN/dS Ratio (significant at  $\alpha = 5\%$  when Z is outside the [-1.96;1.96] interval); nan: not computable due to 0 values; "-": not computable on introns.
