# Supplementary material for: Deciphering the fine nucleotide diversity of full HLA class I and class II genes in a well‐documented population from sub‐Saharan Africa
Source: PubMed Central journal article supplement (PMC5767763; doi:10.1111/tan.13180), 2017-12-25
Supplement: TAN-91-36-s007.pdf [file TAN-91-36-s007.pdf]

## Supplementary Information S04

**Table S04-1: Global linkage disequilibrium between the 8 HLA loci.**

Both parametric and non-parametric tests have been used with the GENE[RATE] computer tools. Significant values are in bold ( $p < 0.05$ ).

| P-values for parametric test     |       |       |       |                 |                 |                 |                 |                |
|----------------------------------|-------|-------|-------|-----------------|-----------------|-----------------|-----------------|----------------|
|                                  | HLA-A | HLA-B | HLA-C | HLA-DRB1        | HLA-DQA1        | HLA-DQB1        | HLA-DPA1        | HLA-DPB1       |
| HLA-A                            | —     | 1     | 1     | 1               | 1               | 0.99            | 0.99            | 1              |
| HLA-B                            | 1     | —     | 1     | 1               | 1               | 1               | 1               | 1              |
| HLA-C                            | 1     | 1     | —     | 0.99            | 0.99            | 0.99            | 0.99            | 1              |
| HLA-DRB1                         | 1     | 1     | 0.37  | —               | <b>0.002</b>    | 0.07            | 0.99            | 1              |
| HLA-DQA1                         | 1     | 1     | 0.6   | <b>&lt;0.01</b> | —               | <b>&lt;0.01</b> | 0.99            | 1              |
| HLA-DQB1                         | 0.48  | 1     | 0.27  | <b>&lt;0.01</b> | <b>&lt;0.01</b> | —               | 0.99            | 1              |
| HLA-DPA1                         | 0.79  | 1     | 0.56  | 0.05            | 0.12            | 0.17            | —               | <b>0.00081</b> |
| HLA-DPB1                         | 1     | 1     | 1     | 1               | 1               | 1               | <b>&lt;0.01</b> | —              |
|                                  | HLA-A | HLA-B | HLA-C | HLA-DRB1        | HLA-DQA1        | HLA-DQB1        | HLA-DPA1        | HLA-DPB1       |
| P-values for non-parametric test |       |       |       |                 |                 |                 |                 |                |

Both parametric and non-parametric tests have been used with the GENE[RATE] computer tools. Significant values are in bold ( $p < 0.05$ ).

**Table S04-2: Haplotype frequencies and linkage disequilibrium**

Only haplotypes in positive significant linkage disequilibrium (i.e. standardized residuals > 1.96, and observed frequency > 5%) are listed, in decreasing order of the standardized residuals. D is the value of the linkage disequilibrium coefficient, corresponding of the difference between the observed and expected frequencies. Test were performed with the GENE[RATE] computer tools.

| Haplotypes                  | Observed frequencies | Expected frequencies | Linkage disequilibrium coefficient D | Standardized Residuals |
|-----------------------------|----------------------|----------------------|--------------------------------------|------------------------|
| DQA1*04:01:01~DQB1*04:02:01 | 0,053                | 0,003                | 0,050                                | 10,101                 |
| DQA1*02:01~DRB1*07:01:01    | 0,057                | 0,004                | 0,053                                | 9,732                  |
| DQB1*06:02:01~DRB1*08:06    | 0,060                | 0,004                | 0,056                                | 9,354                  |
| DQA1*05:01:01~DQB1*02:01:01 | 0,088                | 0,008                | 0,079                                | 9,157                  |
| DQA1*05:01:01~DRB1*03:01:01 | 0,081                | 0,008                | 0,073                                | 9,095                  |
| DQB1*02:01:01~DRB1*03:01:01 | 0,078                | 0,009                | 0,069                                | 7,801                  |
| DQA1*01:05:01~DQB1*05:01:01 | 0,053                | 0,005                | 0,048                                | 7,104                  |
| DQA1*01:02:01~DQB1*06:02:01 | 0,070                | 0,009                | 0,062                                | 7,051                  |
| DPA1*03:01~DPB1*105:01      | 0,108                | 0,017                | 0,091                                | 6,998                  |
| DQA1*01:02:01~DRB1*08:06    | 0,057                | 0,007                | 0,050                                | 6,666                  |
| DPA1*02:01:08~DPB1*01:01:01 | 0,078                | 0,011                | 0,068                                | 6,548                  |
| DQB1*02:02:01~DRB1*07:01:01 | 0,052                | 0,006                | 0,046                                | 6,307                  |
| DPA1*03:01~DRB1*08:06       | 0,073                | 0,012                | 0,061                                | 5,366                  |
| DPA1*01:03:01~DPB1*02:01:02 | 0,108                | 0,026                | 0,082                                | 5,125                  |
| A*30:02:01~DQA1*01:02:01    | 0,068                | 0,015                | 0,053                                | 4,873                  |
| DPB1*131:01~DRB1*13:04      | 0,152                | 0,056                | 0,096                                | 4,500                  |
| A*30:02:01~DPA1*03:01       | 0,069                | 0,015                | 0,053                                | 4,301                  |
| DQB1*03:19~DRB1*13:04       | 0,259                | 0,119                | 0,140                                | 4,092                  |
| DQA1*05:05:01~DQB1*03:19    | 0,430                | 0,228                | 0,202                                | 3,963                  |
| DPA1*03:01~DQB1*06:02:01    | 0,065                | 0,015                | 0,050                                | 3,875                  |
| DQA1*05:05:01~DRB1*13:04    | 0,282                | 0,148                | 0,135                                | 3,609                  |
| DPA1*01:03:01~DRB1*03:01:01 | 0,052                | 0,012                | 0,039                                | 3,426                  |
| DPA1*02:01:01~DPB1*131:01   | 0,201                | 0,097                | 0,104                                | 3,198                  |
| DPA1*02:01:01~DPB1*17:01    | 0,201                | 0,097                | 0,104                                | 3,198                  |
| C*16:01:01~DPB1*01:01:01    | 0,065                | 0,020                | 0,044                                | 3,198                  |
| DPB1*131:01~DQA1*05:05:01   | 0,171                | 0,097                | 0,074                                | 2,616                  |
| A*30:02:01~C*04:01:01       | 0,055                | 0,020                | 0,035                                | 2,565                  |
| A*33:03:01~DRB1*13:04       | 0,069                | 0,031                | 0,039                                | 2,454                  |
| A*33:03:01~DPB1*17:01       | 0,057                | 0,024                | 0,032                                | 2,428                  |
| DPA1*02:01:01~DRB1*13:04    | 0,206                | 0,117                | 0,090                                | 2,418                  |
| A*23:01:01~B*35:01:01       | 0,065                | 0,029                | 0,036                                | 2,409                  |
| DPA1*03:01~DQA1*01:02:01    | 0,061                | 0,025                | 0,036                                | 2,238                  |
| B*35:01:01~C*16:01:01       | 0,065                | 0,028                | 0,037                                | 2,237                  |
| DQA1*05:05:01~DRB1*11:01:02 | 0,089                | 0,045                | 0,044                                | 2,236                  |
| C*04:01:01~DPB1*105:01      | 0,052                | 0,021                | 0,031                                | 2,217                  |
| B*35:01:01~DPB1*131:01      | 0,067                | 0,032                | 0,035                                | 2,195                  |
| DPB1*131:01~DQB1*03:19      | 0,148                | 0,086                | 0,061                                | 2,177                  |
| DQB1*03:19~DRB1*11:02:01    | 0,069                | 0,033                | 0,036                                | 2,059                  |
| B*52:01:02~DQB1*03:19       | 0,052                | 0,023                | 0,029                                | 2,046                  |
